## INTROGRESSIVE DESCENT AND HYPERSEXUALITY DRIVE THE EVOLUTION OF SEXUAL PARASITISM AND MORPHOLOGICAL REDUCTION IN A FUNGAL SPECIES COMPLEX.

Fernando Fernández-Mendoza<sup>1</sup>, Eva Strasser<sup>1</sup>, Ivan Frolov<sup>2</sup>, Jan Vondrák<sup>3,4</sup>, Lucia Muggia<sup>5</sup>, Helmut Mayrhofer<sup>1</sup>, Ester Gaya<sup>6</sup> & Martin Grube<sup>1</sup>

<sup>1</sup>*Institute of Biology, Karl-Franzens-Universität Graz, A-8010, Graz. AUSTRIA.*

<sup>2</sup>*Russian Academy of Sciences, Ural Branch: Institute Botanic Garden, Vosmogo Marta Str. 202a, Yekaterinburg 620144, Russia.*

<sup>3</sup>*Institute of Botany of the Czech Academy of Sciences, CZ-252 43 Průhonice, Czech Republic.*

<sup>4</sup>*University of South Bohemia, České Budějovice, CZECH REPUBLIC.*

<sup>5</sup>*Department of Life Sciences, Università degli Studi de Trieste, FVG, ITALY.*

<sup>6</sup>*Royal Botanic Gardens, Kew, Richmond, UK.*

*E-mail: fernando.fernandez-mendoza@uni-graz.at*

### ABSTRACT:

Taxonomists consider species as discrete units of biological organization, which are subject to a continuous process of evolutionary change and are connected through their shared ancestry. However, the continuous nature of evolutionary change is difficult to reconcile with the discrete outcome of speciation, especially where species boundaries are permeable. A good example of this inconsistency is the lichen genus *Pyrenodesmia*, which shows a high morphologic and genetic diversity that defies systematization by taxonomic or phylogenetic methods. Here we show that hybridization explains the presence of discordant morphs and that European species are interconnected through cross-mating in a single reproductive network, a syngameon, despite which species remain largely distinct and distinguishable. Whole genome data reflect the important role played by genome defense mechanisms in the genomic stabilization of fungal hybrids. The recurrence of Repeat Induced Point mutations (RIP) shapes genomes with islands of suppressed recombination and loss of gene content, which in turn generates a feedback loop reinforcing the lack of reproductive isolation through the loss of heterokaryon incompatibility and a tendency towards morphological reduction.

### BODY

1 The idea that life is structured into discrete evolutionary units (i.e. species) is central to  
2 biological science, and articulates the way we understand, organize and communicate  
3 biodiversity. Considering species as the natural unit of biological organization,  
4 evolution, and ecological interaction is a widely accepted simplification that allows  
5 linking evolutionary biology with all other disciplines in biology, from ecology to  
6 molecular biology, but overlooks significant aspects of the way organisms evolve. First  
7 and foremost, species cannot be considered as the only unit of selection and evolution  
8 because both processes are acting simultaneously across all levels of organization (1–  
9 3). Second, there is no unifying consensus on what species are, their necessary

10 properties (4–15), and how they integrate into a continuous process of evolutionary  
11 change. This has led to discussing whether species provide any usable insight when  
12 dealing with prokaryotic lineages (16–19).

13  
14 The need to consider evolution and selection as multilevel processes has become ever  
15 more apparent with the increased availability of sequenced genomes. Horizontal  
16 transfer of genetic information between distant organisms is more frequent than once  
17 thought and has been identified as a key element in habitat adaptation (20), which  
18 reinforces the idea that communities function as supra-specific evolutionary units (21)  
19 shaped by the transfer of information through non-genealogical bonds (3). Similarly,  
20 the study of hybridization between closely related plant and animal species has long  
21 identified species complexes in which phenotypically differentiated species are  
22 interconnected through gene flow. Both syngamea (22, 23) and metasppecies (24, 25)  
23 can be interpreted as supra-specific units of evolution. Conversely, the detailed  
24 comparative study of genomes identified significant asymmetries in the distribution of  
25 recombination, hybridization and mutation among genomic regions (26–28). This  
26 heterogeneity, which influences and is influenced by the underlying genomic  
27 architecture, results in identifying genomic islands of speciation (29) and local  
28 adaptation (30), which can be interpreted as infra-individual units of selection.

29  
30 Next, the use of molecular genetic characters and phylogenetic methods (31) in fungal  
31 research fundamentally changed the way diversity is studied and understood. In the first  
32 instance, genetic characters allow identifying cohesive and diagnosable (6) groups of  
33 specimens even when the “discontinuity of organic variation”(32) is not observable  
34 using morphology and chemistry. Furthermore, the presumed objectivity of genetic  
35 characters and phylogenetic methods resulted in a widespread redefinition of fungal  
36 taxa in terms of monophyly (33–37) and a widespread identification of cryptic species  
37 (38–51) in fungi. This resulted in considering that the “true diversity of fungi” (52) had  
38 been obscured by overly wide taxonomic concepts based on morphology. To open the  
39 treasure chest of fungal diversity, molecular taxonomists progressively incorporated  
40 growingly complex methods of unsupervised species discovery and validation (53–61).  
41 However, recent surveys tone down notably the former claims made on the extent of  
42 fungal diversity (62) former claims on hidden fungal diversity. In addition to the known  
43 limitations of DNA barcoding when used for species delimitation, validation, and  
44 recognition (63), phylogenetic methods of species delimitation (31), despite their  
45 progressive refinement (64–71), are quite limited in their application and share the same  
46 caveats. First, they cannot accommodate gene flow (72–74) unless species limits are  
47 imposed a priori (75–83). Second, they are only meaningful when populations don’t  
48 deviate significantly from classical population genetics models (84). Both limitations  
49 have been systematically overlooked despite the growing evidence that species  
50 boundaries are semi-permeable (85) in lichenized (86–88) and non-lichenized fungi  
51 (89–91), and the evidence that the outcome of reproduction may not adhere to  
52 mendelian inheritance (92–94) or the simplistic expectations of Hardy-Weinberg  
53 equilibrium.

54  
55 Here we evaluate the diversity observed in the lichen genus *Pyrenodesmia* from  
56 multiple points of view to quantify the usability of phylogenetic species concepts and  
57 the extent to which hybridization and reticulation shape its evolutionary history. Using  
58 a multilevel approach we evaluate the presence of supra-specific evolutionary units,  
59 how they influence the reproductive and evolutionary strategies of species within the

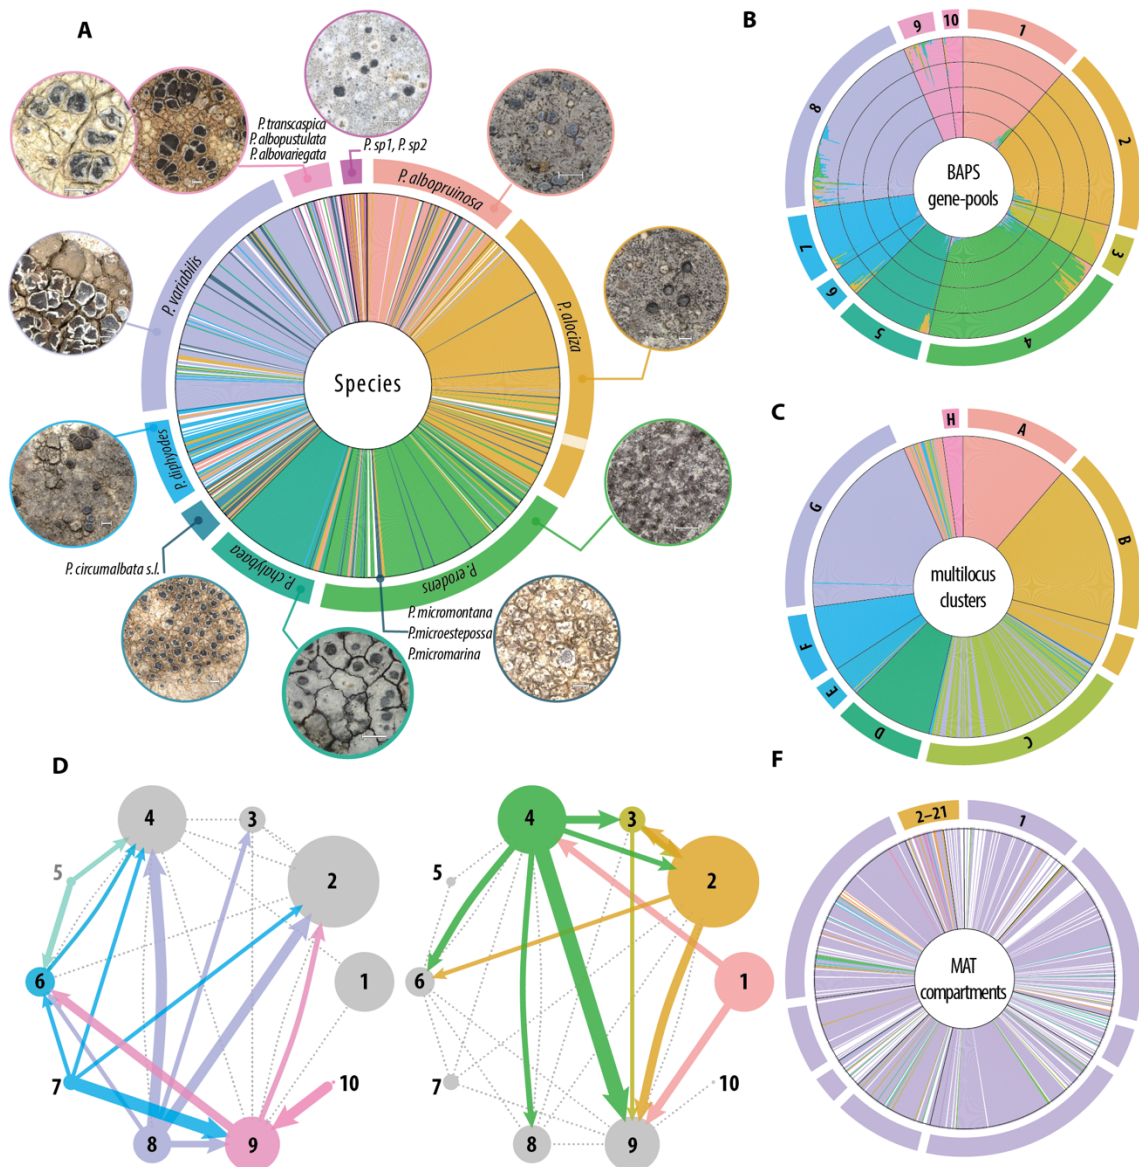

**Fig. 1 Taxonomic, phylogenetic, and population summary of the dataset.** Figures a-c and f provide a graphical summary of the structure of the dataset using the assignment of specimens to gene-pools estimated in BAPS as organizing scaffold. **a** | Assignment of individual specimens to the twelve most relevant morphospecies. A more complete taxonomic profile is provided in the supplementary material. Each color signifies the assignment to a species or species group. The scale bars in all habitus pictures amount to 500 $\mu$ m. **b** | Assignment to admixed gene-pools (populations) obtained in BAPS, each specimen is represented by a stacked barplot. The color highlights the proportion of the variability assigned to each of the ten estimated admixed pools. **c** | Assignment to putative species (coassignment clusters) using a multilocus interpolation of single locus bGMYC assignments. All clustering algorithms consistently identified eight clusters. **d-e** | Estimates of migration between the BAPS gene-pools calculated using in migrate-n. For clarity, the network is split into two subnetworks highlighting gene flow from pools mostly containing well-developed epilithic species and those from pools comprising mostly reduced endolithic species. Each node is a numbered gene pool, correlative to the numbering used in fig.1a. the size of each bubble represents the estimated mutationally scaled population size ( $\theta$ ), and the edges represent immigration estimates recalculated to represent the number of immigrants per generation ( $2N_e$ ). The size of each edge represents the migrant estimates provided in the supplement. The network was simplified to include only strong connections ( $2N_e > 2$ ). **f** | Assignment to Mating compartments using the unipartite network of MAT idiomorph cooccurrence. The network contains a main subnetwork comprising most specimens and 20 secondary ones.

60 genus, as well as the influence that hybridization may have on genome architecture and  
61 mosaicism.

62

63 We ask the following questions: (i) What is the diversity of the genus *Pyrenodesmia* in  
64 the European continent? (ii) Are phylogenetic species concepts usable? How many  
65 phylogenetic species are there? (iii) Is there evidence of hybridization in the genus? (iv)  
66 What are the reproductive units (v) What are the genomic consequences of reticulate  
67 evolution and hybridization?

68

69 **One-third of European *Pyrenodesmia* specimens cannot be identified using**  
70 **existing morphological species concepts.**

71

72 The genus *Pyrenodesmia* s.s. (34) is a widespread lineage of lichenized fungi within  
73 the family *Teloschistaceae* whose species form mostly saxicolous crusts and share the  
74 lack of anthraquinone pigments as the most obvious, albeit paraphyletic character (95).  
75 Its species are quite diverse in apothecial morphology, thallus pigmentation, and thallus  
76 development, ranging from the large crusts of *P. transcaspica* to the endolithic thalli of  
77 *P. erodens*, *P. albopruinosa*, and *P. alociza* (Fig 1a). Despite the substantial  
78 morphological and ecological differences, the taxonomy of the genus remains unclear.  
79 The main culprits are the low signal found in micromorphological characters and the  
80 abundance of intermediate forms which are difficult to interpret. As a result, pre-  
81 molecular taxonomic works (96–98) used a broad concept of species (i.e. *P. variabilis*  
82 or *P. circumalbata*) and their classifications were often disparate. Meanwhile, recent  
83 phylogenetic surveys consistently describe new species using monophyly as diagnostic  
84 criterion (99–106), suggesting that a significant proportion of the species diversity  
85 remains unidentified.

86

87 As starting point we opted for re-evaluating the species diversity of the genus  
88 *Pyrenodesmia* in a well-studied region, so we assembled a dataset comprising mostly  
89 saxicolous species growing on limestone across Southern Europe (Table S1, Figure S1).  
90 Based on the taxonomic literature we expected to find at least seventeen distinct  
91 species, six of which are common in Southwestern Europe (*P. albopruinosa*, *P. alociza*,  
92 *P. chalybaea*, *P. circumalbata*, *P. erodens* and *P. variabilis*), five are difficult to  
93 differentiate from each other (*P. diphyodes*, *P. helygeoides*, and *P. microsteposa*, *P.*  
94 *micromarina* and *P. micromontana*) and one is rare (*P. badioreagens*). The remaining  
95 five species occur outside of the studied region (*P. albopustulata*, *P. albovariegata*, *P.*  
96 *concreticola*, *P. molariformis* and *P. transcaspica*) and were included to provide a  
97 wider geographic and taxonomic context. The morphological study resulted in  
98 identifying 42 operational units (species and pseudospecies) of which twelve were  
99 collected outside of the main study area, nine are clearly identifiable, three have been  
100 described based on molecular characters and are doubtful (Figure 1a) and the remaining  
101 eighteen show intermediate character combinations and are difficult to place, being  
102 potentially undescribed species.

103

104 The consensus in lichenology is that molecular taxonomic methods are necessary to  
105 overcome the bias introduced by overly simple and subjective morphological species  
106 concepts (52, 62). To address diversity, most surveys follow a similar recipe (63):  
107 assembling a phylogenetic dataset, proposing a set of operational taxonomic units  
108 (OTUs), which are finally validated using a multilocus framework, often based on  
109 multispecies coalescent (107–110) or an analogous strategy (111). To evaluate the

110 species diversity of *Pyrenodesmia*, we assembled a phylogenetic dataset including 824  
111 lichen specimens and five nuclear loci (Tables S2-S4). The need to phase sequences  
112 from specimens that included dikaryotic mycelia resulted in a 0.98 complete data  
113 matrix of 910 phased genotypes (Table S3).

114  
115 The resulting dataset showed very high haplotype and nucleotide diversity (Table S3).  
116 Haplotype diversity is reflected in low levels of sequence duplication, with 0.40–0.56  
117 of sequences being unique, meanwhile the high nucleotide divergence between  
118 sequences is best reflected by having between 0.38 and 0.46 of sites being parsimony  
119 informative across all nucleotide alignments, excluding the outgroups.

120 This is very different to what we encountered in previous macrolichen surveys (112–  
121 117) where species tend to comprise: a) few closely related haplotypes, identifiable as  
122 discrete lineages in phylogenetic trees and network reconstructions and b) few  
123 overrepresented haplotypes common across large geographic regions (115, 118, 119).  
124 The observed phylogenetic continuum is similar to that of *Lecanora polytropa*, a  
125 species complex proposed to comprise 70 putative species worldwide (62).

126  
127 **Interpreting diverging genotypes as separate species artificially inflates the**  
128 **estimates of species diversity.**

129  
130 An immediate consequence of interpreting highly diverse single locus alignments in  
131 terms of species delimitation is the proposal of high numbers of putative species (Table  
132 S3). Widespread, albeit simplistic distance-based (ABGD and ASAP) and phylogenetic  
133 methods (GMYC) identify an average of 180 species, although the number of proposed  
134 entities has a wide range between 23 and 368 OTUs depending on the locus, method,  
135 and threshold used for delimitation (Table S3). The high nucleotide divergence found  
136 between haplotypes results in a high abundance of singleton clusters (0.90–0.63),  
137 comprising a single observation, reflected in the strong numerical discordance between  
138 the number of identified clusters and entities in GMYC. The multitree implementation  
139 of the GMYC algorithm (bGMYC), aimed at integrating phylogenetic uncertainty often  
140 results in the most conservative estimates, although they also depend on the criterion  
141 used to obtain a consensus from the coassignment matrix: the average silhouette width  
142 of k-medoids estimated 15–97 OTUs, the median number of partitions 5–50 OTUs.

143 In general terms, the main OTUs statistically associate with the identified  
144 morphospecies across all loci, the correspondence between them is never complete, and  
145 specimens with very different morphology tend to be clumped together (Table S3,  
146 Supplementary material). Furthermore, the OTU delimitations are not fully concordant  
147 between loci. To integrate all sequenced loci on a single delimitation strategy we  
148 combined the bGMYC coassignment matrices obtained for single loci into a single  
149 dissimilarity matrix, which was used to estimate a consensus delimitation using k-  
150 medoids clustering and average silhouette width as criterium (Figure 1c). This  
151 consensus delimitation consistently partitioned the dataset into 8 genetic clusters, which  
152 are largely coherent with single-locus OTUs (Cramer's  $V = 0.81$ – $0.97$ , Supplementary  
153 information), morphology-based identifications (Figure 1a, Cramer's  $V = 0.77$   
154 Supplementary information), and estimates of population structure (Figure 1b,  
155 Cramer's  $V = 0.932$ ). This multilocus consensus, limited as it is by its mathematical  
156 simplicity, highlights the inadequacy of using single locus datasets to generate species  
157 hypotheses and of interpreting speciation as the only source of genetic variability.

158  
159 **Phylogenetic analyses suggest the presence of widespread hybridization.**

160

161 The limitations of phylogenetic methods of species delimitation are well known (31)  
162 and have been thoroughly discussed in the fungal literature (52), despite which they  
163 remain useful for species discovery (62, 63). Most models used in species delimitation  
164 rely on strong assumptions about the contribution that reproductive isolation, genetic  
165 drift, and mutation have to the genetic variability at macro and microevolutionary  
166 levels. Most importantly, phylogenetic species concepts rely on considering species as  
167 reproductively isolated lineages, a condition that is not always met in natural  
168 populations.

169

170 In *Pyrenodesmia*, the phylogenetic signal in the identifiable phenotype-based species  
171 and the concordance between single-locus phylogenies are high and statistically  
172 supported, but still partial. The average concordance between loci, estimated using  
173 Nye's similarity metric (120) on Bayesian tree distributions, amounts to 0.45 (0.15–  
174 0.70) of the average concordance found within loci. The concordant fraction within loci  
175 averages 0.34–0.42, this is significantly higher (ML  $t = 34.99$ ,  $p\text{-value} < 2.2e-16$ ; By  $t =$   
176  $245.11$ ,  $p\text{-value} < 2.2e-16$ ) than the random expectation (ML 0.15, By 0.19), and about  
177 half of the concordance observed within loci (By 0.69  $t = -100.79$ ,  $p\text{-value} < 2.2e-16$ ),  
178 which provides more reasonable null expectation. Despite the concordance found  
179 between loci, the consensus phylogenetic network reflects a strong incongruence  
180 between gene trees, resulting in a single basal polytomy and a significant amount of  
181 reticulation events across the whole extent of the phylogeny (Fig. S3). Pairwise  
182 hybridization numbers (121) also suggest a dominance of hybridization but are  
183 significantly biased by considering both micro and macroevolutionary processes.

184

185 The distribution of phylogenetic signal in phenotypic species measured using Pagel's  $\lambda$   
186 is also revealing (Figure S17). Although most likelihood ratio tests (LR) are significant,  
187 because specimens with similar phenotypes tend to aggregate in discrete lineages across  
188 the phylogenies (Supplementary\_material), coherent groups are often interspersed by  
189 single specimens with discordant phenotypes. The most abundant and well-defined  
190 phenospecies have  $\lambda$  estimates consistently close to 1, whereas putative species that  
191 have intermediate phenotypes, and species that are clearly too broad (e.g. *P.*  
192 *circumalbata*) or some recently defined in phylogenetic terms (*P. micromarina*, *P.*  
193 *micromontana* and *P. microestepossa*) have lower  $\lambda$  values in at least one of the loci.  
194 The distribution of  $\lambda$  is likely influenced by imbalanced sampling size but serves to  
195 illustrate the extent to which intermediate phenotypes are also associated with  
196 intermediate genotypes.

197

198 Quantifying the contribution of hybridization and retention of ancestral polymorphism  
199 to incomplete lineage sorting (ILS) remains a methodological challenge in  
200 phylogenetics. Multispecies coalescent methods consider all ILS to predate species  
201 differentiation, while more complex models (75, 76, 122, 123) are only usable when  
202 clear species concepts can be imposed *a priori*.

203

204 **Analyses of population structure identify ten partially admixed gene-pools which**  
205 **partially match observable phenospecies.**

206

207 An alternative to phylogenetic methods is to estimate population structure under  
208 mixture and admixture models, which can accommodate hybridization. To  
209 accommodate linkage information contained within loci we used the codon model of

210 linkage implemented BAPS (124, 125) in mixture and admixture models. The mixture  
211 analysis identified 10 evolutionary populations (gene pools, Figure 1b) consistently  
212 across starting conditions and the maximum number of populations. Mixture clusters  
213 show a high concordance with phenospecies and bGMYC clusters (figure 1a–c),  
214 although the concordance is, as always partial. The admixed fractions represent a large  
215 fraction of the phylogenetic signal ( $\lambda = 0.95\text{--}0.99$ ), reflecting the similarity of different  
216 clustering results on the same data. The proportion of admixed individuals is quite low;  
217 0.3 of individuals are assigned to a gene pool with a probability above 0.95, while in  
218 only 0.16 the largest fraction represents less than 0.9 of the genetic variation. The low  
219 admixture between gene pools suggests having strong post-mating isolation, as also  
220 does the high concordance between phenospecies and gene pools (0.77). The  
221 contribution of the different gene pools to the admixed signal is somewhat proportional  
222 to the overall representation of each gene pool (i.e. cluster size) in the dataset, but the  
223 linear relationship is not significant as clusters 3 and 4 have a larger contribution to the  
224 admixed signal than expected.

225

### 226 **The contribution to gene flow of gene pools is not uniform**

227

228 The genetic connectivity between the ten gene pools was explicitly modelled using  
229 migrate-n (126) together with approximate demographic parameters (Figure 1d–e). The  
230 model is limited in that it cannot differentiate the different components contributing to  
231 lineage sorting, or better lack thereof. Because it uses a migration rate, it interpolates  
232 the transition between the imposed populations (gene-clusters) across genealogical  
233 time. The analyses were run using a Bayesian method and complete model. The  
234 estimated model parameters were mutationally scaled immigration rates (M) and  
235 effective population sizes ( $\theta$ ), average values have been reinterpreted in terms of  
236 migrants per generation, to filter out biologically relevant connections.

237

238 The contribution of the ten gene pools and their associated species to gene flow is not  
239 uniform, coherent with the general observation that hybridization propensity is not  
240 uniform across species and that patterns of hybridization are often dominated by a few  
241 species (22). Gene pool number five, strongly associated with *P. chalybaea*, is largely  
242 isolated from the rest, and only has a significant contribution to geneflow into pools six  
243 and four. The overall pattern of gene flow is strongly dominated by gene flow from to  
244 pools 1–4 associated with highly reduced endolithic species (Figure 1a,d–e). Clusters  
245 6,7, 9 and 10 comprise a large fraction of species that are underrepresented in the dataset  
246 or that show intermediate morphologies and may be misrepresenting the underlying  
247 biological compartmentalization and are strongly interconnected between them. Cluster  
248 8 which largely contains specimens of *P. variabilis* is the stronger contributor to  
249 geneflow into the reduced phenospecies, followed by cluster 7 which is loosely  
250 associated with *P. helygeoides* and *P. diphyodes* while cluster 9 is the one receiving  
251 most gene flow from them. In terms of mutationally scaled immigration rate, the  
252 stronger connectivity is found between pools 2 and 3 which are largely conspecific (*P.*  
253 *alociza*) and are clustered together in bGMYC (Figure 1), pool three is exclusively  
254 Iberian and could represent either resulting from population structure per se or be  
255 reflecting the assimilation of a preexisting species into *P. alociza* through introgression.  
256 Next to them the highest estimates of M is immigration into pools 6, 7, 8 and 9 from 4  
257 and into 3,4,5, and 6 from 8.

258

259 The marked imbalance in gene flow to and from the reduced phenospecies and the  
260 abundance of intermediate morphs suggest that, despite the strong genetic signal, the  
261 evolution of *Pyrenodesmia* is strongly shaped by introgression and hybridization. While  
262 the group is likely formed by at least ten differentiated ancestral evolutionary  
263 populations or species, different genetic combinations contributed significantly to the  
264 observed genetic and phenotypic variability in the genus, making its systematic  
265 taxonomic treatment very difficult, and maybe even undesirable.

### 266 267 **Sequencing of mating type (MAT) idiomorphs identifies a large syngameon in** 268 **European *Pyrenodesmia*.**

269  
270 Despite the frequent claims of being integrative, “molecular taxonomic” surveys are  
271 often plagued by *post hoc* theorizing, because they use the same data for hypothesis  
272 generation and testing. To avoid this limitation we devised a method to identify  
273 reproductive compartments (i.e. biological species) by quantifying reproductive  
274 isolation at the dikaryotic stage, premating isolation in the sense of Steensels et al. (90).  
275 To do this we sequenced the MAT idiomorphs in samples containing dikaryotic mycelia  
276 and quantified their reciprocal association using: a) cophylogenetic methods, b)  
277 bipartite networks and c) unipartite networks. Each method provides a different  
278 perspective, but the unipartite networks at individual level provided the best framework  
279 to assign individual samples to reproductive units. We queried genome drafts of  
280 *Pyrenodesmia* for MAT cassettes and developed specific primers for two coding  
281 regions found in the complementary idiomorphs: the putative pheromone receptor of  
282 *mat1-1* and the homeobox domain of *mat1-2* (127). To simplify we will address them  
283 as alpha ( $\alpha$ ) and hmg respectively. The widely conserved, bipolar mating system and  
284 the widespread homothallism found in *Lecanoromycetes* greatly simplify the analyses.

285  
286 We obtained sequences of either one of the idiomorphs in 0.88 of the samples; in 0.51  
287 we obtained sequences of both mating types (Supplementary table 3), as in general we  
288 avoided including apothecia or apothecial primordia in the DNA extractions. The  
289 genetic diversity of the MAT idiomorphs in the reduced datasets is similar to those  
290 estimated for the phylogenetic loci (nucleotide diversity  $\alpha = 0.06$ ; hmg = 0.05),  
291 although haplotype diversity is higher ( $\alpha = 0.681$ ; hmg = 0.572) resulting in a high  
292 proportion of unique haplotypes ( $\alpha = 0.66$ ; hmg = 0.57).

293  
294 The cophylogenetic signal in nucleotide datasets collapsed to haplotypes was evaluated  
295 using two closely related methods: RandomTaPas (128), which is recursive, and PaCo  
296 (129) which is a global method to interpret large tanglegrams. Both, identified low  
297 cophylogenetic signals with normalized Gini coefficients ( $G^*$ ) of 0.76, which,  
298 interpreted as a fraction of dissimilarity, is roughly the inverse of the 0.15 concordant  
299 fraction found between observed and randomized phylogenies for the phylogenetic loci.  
300 Cophylogenetic methods summarizing multiple random tanglegrams contain very few  
301 well-supported cophylogenetic relationships, suggesting the absence of a  
302 coevolutionary association between both mating type idiomorphs. This can also be  
303 caused by the alteration of genetic drift due to the suppressed recombination around the  
304 mating type cassette (130).

305  
306 To better model reproductive isolation, we made use of network models implemented  
307 in R packages *bipartite* (131) and *igraph* (131, 132). Under the premise that mate  
308 recognition and compatibility function at protein level, we translated the nucleotide



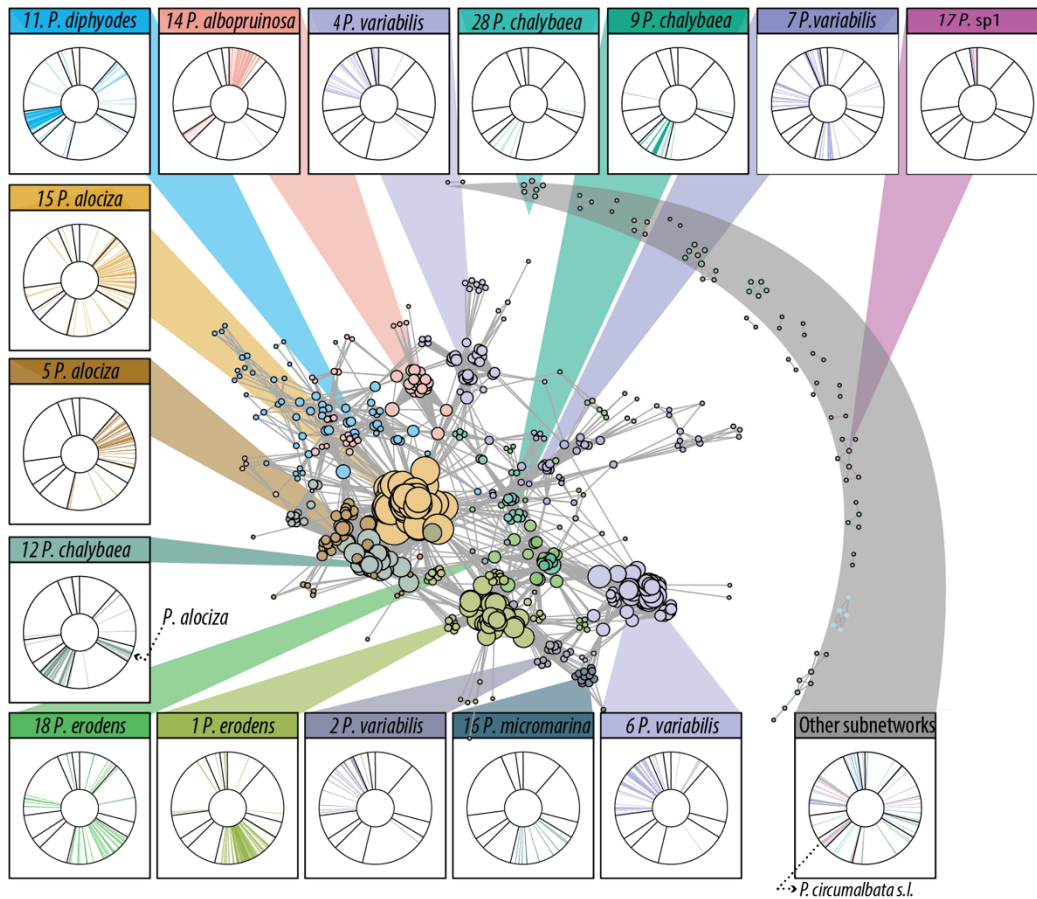

**Fig. 2 Modularity of the unipartite network of MAT idiomorph cooccurrence.** Figures a-c and f provide a graphical summary of the structure of the dataset using the assignment of specimens to gene-pools estimated in BAPS as organizing scaffold. estimates provided in the supplement. The network was simplified to include only strong connections ( $2N_e > 2$ ). f | Assignment to Mating compartments using the unipartite network of MAT idiomorph cooccurrence. The network contains a main subnetwork comprising most specimens and 20 secondary ones.

309 sequences and collapsed them to 0.99 similarity haplotypes (133). Additional analyses  
310 using nucleotide and aminoacid haplotypes were also carried out. Because they differ  
311 in their resolution but not in the overall pattern and are left out of the manuscript.

312

313 Bipartite networks use the haplotypes of the alpha and hmg idiomorphs as independent  
314 strata, giving two disjoint sets of nodes. The edges quantify the times each combination  
315 of haplotypes is found in the dataset. In unipartite networks nodes represent specimens  
316 and edges quantify the number of aminoacid haplotypes of any of the two idiomorphs  
317 number shared between specimens.

318

319 All estimated networks show a similar pattern of compartmentalization, with a single  
320 subnetwork grouping most of the nodes, that is 0.69 in the bipartite network of  
321 haplotypes, 0.87 in the bipartite network at 0.99 similarity and 0.89 in the unipartite  
322 network (Figure 1f). The rest of the subnetworks group underrepresented sequences,  
323 species and geographic regions. The number of compartments is proportional to the  
324 similarity threshold used to compress the dataset, decreasing from 66 to 22 when  
325 collapsing the aminoacid sequences to 0.99 similarity (Figure 2, Supplementary  
326 material). The statistical properties of the complete network, obviously arise from those  
327 of the main interconnected subnetwork. Both have very low density (0.036, 0.045), low  
328 average centrality (0.059, 0.074) and an average path length of (3.654, 3.656)  
329 (Supplementary table X). The distribution of statistical properties at the network level  
330 is not homogeneous between species, and nodes identified as *P. alociza* and *P. erodens*  
331 tend to have a higher centrality and degree than the rest, while betweenness is similar  
332 across the network.

333

334 The presence of well-supported reproductive units (modules) was further investigated  
335 using the Louvain (134) community detection algorithm on the unipartite network. The  
336 performance of different algorithms was evaluated using Bayes Factors and two null  
337 models using R package *Robin* (135). The selected Louvain algorithm estimated a  
338 modularity of 0.77 for the complete network, and split the main compartment into 13  
339 modules, adding up to a total of 34 modules (Figure 2), which group between 0.11 and  
340 0.05 of the specimens. Their assignment to modules is quite coherent with the results  
341 of population genetics and bGMYC, but the overall association estimated using  
342 Cramer's V between phenospecies and modules (0.47), and between modules and  
343 phenospecies per geographic region (0.57), are weaker than that reported between  
344 phenospecies and gene-pools (0.77), despite having a larger number of categories.

345

346 The bipartite networks are less useful to assign specimens to single reproductive  
347 compartments but allow addressing whether asymmetries in connectivity between  
348 both strata. The 0.99 bipartite network is very similar to the unipartite network in  
349 terms of compartmentalization (21 compartments). In both cases, the diversity of the  
350 alpha locus (Supplementary table 3) is slightly higher than that of hmg, which results  
351 in a slightly asymmetric network. (-0.19). The c-scores show disaggregation in both  
352 levels, but the checkerboard analyses are biased by the abundance of zero values. The  
353 V.ratios give a better representation of aggregation and show that the hmg stratum is  
354 more aggregated (6.18) than alpha (1.39), which is slightly higher than the numerical  
355 imbalance between the number of haplotypes in both strata ( $\text{hmg}/\alpha = 91/136 = 0.67$ ).  
356 The higher mean number of shared partners ( $\text{hmg}/\alpha = 0.07/0.11 = 0.64$ ) and partner  
357 diversity ( $\text{hmg}/\alpha = 0.9/1.45 = 0.62$ ) found for the hmg locus likely reflect this  
358 numerical imbalance. Contrarily, the mean number of links per sequence is much

359 higher in hmg (8.8) than in alpha (3.93) and differs (0.45) from the reported  
360 asymmetry expected as a result of haplotype richness. This asymmetry is likely to  
361 result from a net difference in specificity between both strata, as reflected by hmg  
362 having a much higher number of realized links than alpha, as shown by the net  
363 difference in cluster coefficient (hmg = 0.065,  $\alpha$  = 0.043), although when weighted  
364 using Ophal's method based on four-paths, cluster coefficients are higher in alpha  
365 (0.20) than in hmg (0.12) due to the imbalance between both strata.  
366

367 In summary, the study of mat loci show that *Pyrenodesmia* forms a complex syngameon  
368 in Europe in which species keep their reproductive boundaries open and are able to  
369 hybridize with each other. Mating happens randomly across the dataset, but at the same  
370 time is highly structured. It is not reasonable to consider mating as equally probable  
371 across all specimens in the dataset, because geographic and ecological boundaries, local  
372 vicinity and population sizes contribute significantly to premating isolation and have  
373 not been explicitly accounted for. The randomness in mating is supported by the lack  
374 of cophylogenetic signal found at nucleotide level, and most importantly by the lack of  
375 significant difference between the observed unipartite network and the most  
376 conservative null model, a random graph (dk-series 2.1 model), which preserves the  
377 joint degree distribution and the clustering coefficient of the original network but not  
378 the full clustering spectrum (136). Overall, there is a clear preference for intraspecific  
379 mating, or mating within gene pools (Supplementary\_material), which is obviously  
380 limited by the local occurrence of both species and genotypes. Furthermore, the  
381 discordance found between the promiscuity identified in dikaryotic samples and the  
382 gene-pool structure suggests that premating reproductive barriers are weaker than post-  
383 mating barriers in *Pyrenodesmia*. A thread of doubt does remain, because it is possible  
384 that the post-mating hybridization identified in the sanger dataset reflects the presence  
385 of non-viable dikaryotic combinations caused by the lack of mating isolation, and not  
386 actual recombined hybrids.  
387

### 388 **Phylogenomic reconstructions identify signatures of both hybridization and** 389 **hybrid speciation.**

390  
391 To address this discordance, we looked for signals of hybridization at a genomic scale.  
392 We assembled a comparative genomic dataset including 23 specimens of *Pyrenodesmia*  
393 and two external references (Supplementary\_material). Their phylogenomic  
394 examination was carried out using 2767 single copy orthologous genes, whose  
395 phylogenetic trajectories were modelled independently using maximum likelihood  
396 (ML) and bootstrapped replicates for nodal support. The summary Figure 3d combines  
397 the topology of a cluster consensus network (Figure S4) and the nodal support values  
398 of a consensus phylogenetic tree (Figure S5). Both consensus approaches allow  
399 identifying a phylogenetic signal of hybridization at whole genome level. The  
400 estimation of pairwise hybridization networks (121) identifies 6 hybridization events  
401 across the ML reconstructions, which is coherent with the reticulations depicted in the  
402 cluster consensus network. Three of them are intraspecific, while two link specimens  
403 of *P. alociza* with non-endolithic species, some ill-defined reduced morphs. A third  
404 interspecific reticulation is basal to a wider clade containing *P. erodens*, which is  
405 otherwise well supported with 0.92 internode and tree certainty values.  
406

### 407 ***P. erodens* shows signs of genome concertation and stabilization.**

408

409 The evolutionary importance of hybridization has been recently reconsidered in whole  
410 genome surveys, which found evidence of cross-specific gene transfer across the  
411 eukaryotic tree of life, contradicting the canonical view that hybridization is a rare and  
412 deleterious event. Hybridization in fungi (90), originating through sexual or parasexual  
413 gene transfer (137), has been identified as a major cause of genomic instability (138)  
414 but has also been proposed as an important source of adaptive traits and genetic  
415 variability (20). What is still not clearly understood is the outcome that hybridization  
416 has in haploid organisms, in which the vegetative outcome is not necessarily a one-to-  
417 one hybrid, but a complex gradient of recombined genotypes. Additionally,  
418 chromosomal structure may determine a mosaic of regions with enhanced and  
419 suppressed recombination, and genome defence mechanisms may determine  
420 asymmetries in the stability of gene content in hybrids.

421  
422 We addressed this heterogeneity using the genome of *P. erodens* as baseline reference.  
423 Despite the strong contribution of this species to the overall admixed signal, and mating  
424 network, the phylogenomic reconstruction suggest that its genome has been shaped by  
425 an old hybridization event. Its evolutionary placement is quite coherent across loci and  
426 seems dominated by mechanisms ensuring the stability of its gene content. With 41.8Kb  
427 its genome is 0.3 larger than the quasi-complete reference genomes of *X.parietina* (14)  
428 and *G. flavorubescens*, but contains roughly twice the number of chromosomes (24,14  
429 and 11.5 respectively) approximated counting telomeric (CCCTAA/TTAGGG)n  
430 motifs, 14 on both ends, 20 on one end in *P. erodens*. The genome size is not  
431 significantly different to other *Pyrenodesmia* draft genomes, although their sizes may  
432 be smaller due to the stringent metagenome filtering used.

433  
434 The difference in chromosome number and the similarity in genome sizes suggests that  
435 genome duplication or aneuploidy may have shaped the evolution of the whole genus.  
436 More contiguous assemblies would be needed to thoroughly discuss the extent to which  
437 this is shared among *Pyrenodesmia* species or reflect older events taking place within  
438 the subfamily *Caloplacoideae*. The ancestral origin of the hybridization event is also  
439 supported by the low of heterozygosity found and the low levels of interchromosomal  
440 homology observed, with a single intragenomic syntenic region between chromosomes  
441 15 and 24, related to mobile elements, and the lack of shared k-mers between scaffolds.

442  
443 Despite being similar in size, the genome of *P. erodens* has a lower gene content than  
444 the other high contiguity genomes in the dataset (Supplementary\_material). This  
445 slight depauperation is also observable in the functional annotations, where the  
446 tendency towards a reduction of genes identified per functional unit (e.g. pfams,  
447 interpro, COGS, etc.) is clearly observable (Figure 4b) although it is partly obscured  
448 by the overall stability in gene content (Figure 4a). The simplification of the genome  
449 also results in a reduction on the number of tRNAs (46) compared to the references  
450 (57), which could also explain the loss of genes with discordant codon usage. The rest  
451 of *Pyrenodesmia* genomes show similarly reduced tRNA counts, except for *P. alociza*  
452 which has consistently higher tRNA counts (77–137), correlated with the strong  
453 signal of hybridization found for all its specimens in the phylogenomic dataset.

454  
455 **Genome defence mechanisms are largely responsible for the simplification of the**  
456 ***P. erodens* genome.**

457

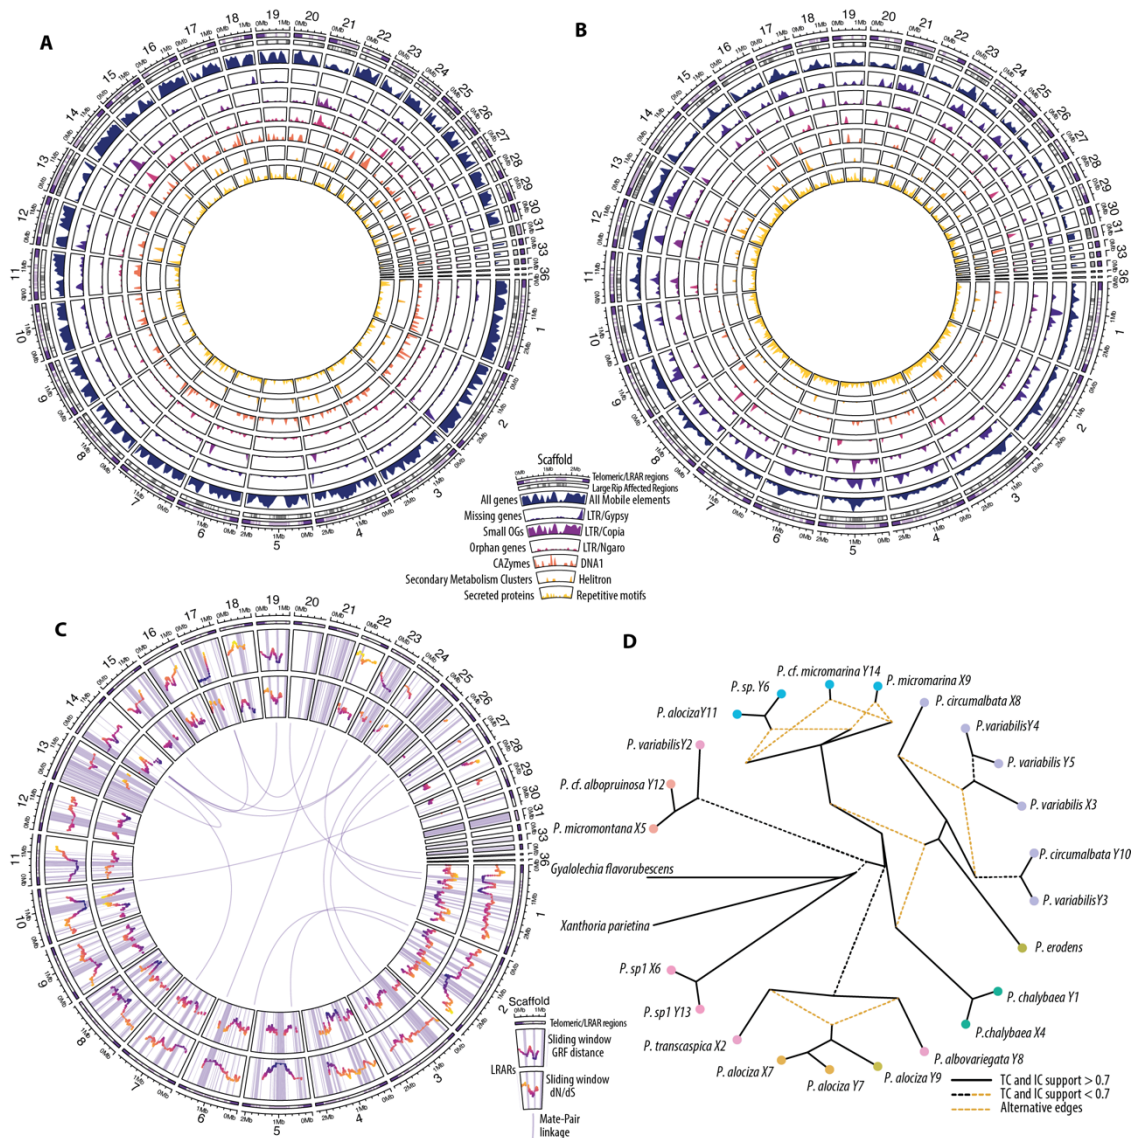

**Fig. 3 Summary of the genomic draft of *Pyrenodesmia erodens* and its phylogenomic context.** **a** | Genome structure and annotation. The plot represents the individual scaffolds numbered from 1 to 36 and their length. Each sector contains the following fields: 1 | Regionalization. Telomeric and subtelomeric regions of 0.35Mb from the terminus are highlighted in darker color, large RIP affected regions (LRARs) and 0.03Mb flanks are highlighted in a lighter color. 2 | LRARs identified using theRipper. 3 | Density plot of coding regions calculated using a sliding window of 50Kb, common to all other density plots. 4 | Density of missing genes, it considers the syntenic position of genes missing in the syntenic blocks of *P. erodens* but present in more than X other *Pyrenodesmia* genomes. 5 | Density of genes assigned to small OGs) found in at least 5 genomes. 6 | Density of singleton or orphan genes, assigned to OGs found only in *P. erodens*. 7 | Density of genes related to Carbohydrate metabolism (CAZymes) 8 | Density of Secondary metabolism clusters (Terpenes, PKS and NRPKS) 9 | Density of secreted proteins. **b** | Annotation of repetitive and transposable elements in the *P. erodens* genome. Each sector contains nine fields, the first two are the same as above, the rest show the estimated densities of: 3 | All mobile elements. 4 | LTR/Gypsy. 5 | LTR/Copia. 6 | LTR/Ngaro. 7 | DNA elements including those of Voyager proteins 8 | helitron 9 | repetitive sequences. **c** | Summary of the phylogenetic landscape across the *P. erodens* genome. Each sector representing a scaffold contains three fields: 1 | regionalization of the genome. 2 | Generalized Robinson-Foulds distances between neighboring single copy orthologous genes (SCOGs). Each data point represents the average distance between the ML phylogenetic reconstructions on overlapping sliding windows containing 20 consecutive SCOGs. Vertical bands highlight the identified LRARs including centromeric regions. 3 | Sliding window of dN/dS values calculated using the same method as above. On both the numerical values are emphasized by using a color gradient between blue and orange. The central region of the plot shows the linkage between scaffolds using regions with a high density of split mate-pairs, in which each paired sequence aligns to a different scaffold. **d** | Phylogenomic consensus network. Well supported edges (IC and TC > 0.7) are drawn as whole black lines, edges common between the consensus tree and network reconstructions but with lower support are shown as black dotted lines. Edges representing a hybridization event, with IC/TC values are highlighted as colored dotted lines. The color of each tip is coherent with the assignment to the gene pools in Fig1b.

458 The dataset shows significant conservation of syntenic blocks, but loss of individual  
459 genes is widely distributed across the genome. Most notably, the genome of *P.*  
460 *erodens* is largely affected by Repeat Induced Point Mutations (RIP), a genome  
461 defence mechanism largely responsible for preventing the proliferation of  
462 transposable elements (TEs) in fungal genomes. Because RIP is a widespread  
463 mechanism in fungi, the GC content (0.44) and the proportion of the *P. erodens*  
464 genome affected by RIP (0.28) are within the values observed in other Ascomycota  
465 (Supplementary\_material). What makes this genome peculiar that most RIP is found  
466 within large RIP affected regions (LRARs), adding up to 0.27 of the total genome  
467 size. Also, these LRARs are unevenly distributed among the scaffolds (Figure 3a–c),  
468 eight of which (11–13, 15, 17, 21, 23 and 25) are disproportionately affected by RIP  
469 (Figure 3a–c) to the extent of having very low coding density (Figure 3a), a high  
470 density of genes missing from syntenic blocks (Figure 3a), identified as single-copy  
471 orthologs (Figure 3c) and hardly any gene with a functional annotation (Figure 3a).  
472 These “supernumerary scaffolds” do not simply represent assembly artifacts, they are  
473 long (1.54–0.7 Mb) and amount to 0.22 of the total genome size.

474  
475 The canonical view is that LRARs result from the proliferation of TEs and the  
476 subsequent genome defence. In addition to that, we hypothesize that RIP is a strong  
477 force driving genome stabilization and concertation, if not by itself, coupled with  
478 other mechanisms of genome defence and RNA interference. This idea is coherent  
479 with the evidence that fungal polyploids are most obvious in yeasts defective in RIP  
480 associated genes (139). RIP eliminates non-contiguous homologous chromatin  
481 regions which are repeated. In its nature RIP is symmetric, resulting in the deletion of  
482 both copies in a heterokaryon. What we observe, however is the maintenance of genes  
483 that largely share a common phylogenetic history, a directionality that could be  
484 explained by a hypothetical interaction between RNA interference mechanisms and  
485 RIP. Beyond hypothetical considerations, this directionality can be observed in the  
486 strong association between LRAR and mobile element density in the described  
487 “supernumerary scaffolds”. The causal relationship is however difficult to establish  
488 because most of the signal is caused by the presence of LTR/Copia and LTR/gypsy  
489 elements which attach specifically to GC poor regions such as centromeres. It has  
490 been hypothesized that the proliferation of repetitive elements is also promoted by  
491 hybridization, but the extent to which LRARs originate from LTR-mediated extension  
492 of RIP affected regions or are the original cause of RIP is difficult to assess.  
493 Moreover, LTR elements are typically found in centromeres, and although we  
494 attempted classifying LRARs according to their content in transposable elements, we  
495 did not manage to properly differentiate centromeres from secondary LRARs. Finally,  
496 RIP tends to extend beyond the homologous region potentially altering flanking  
497 genes. In *P. erodens* we found a strong collinearity between the density of genes  
498 missing from syntenic blocks and the density of transposable elements using sliding  
499 windows (Supplementary\_material) as well as a negative correlation with the total  
500 gene density. This correlation is stronger when telomeric regions are excluded, but is  
501 not statistically supported when windows with 0 genes are taken out. Overall  
502 suggesting a strong association between the loss of genes and the action of RIP on the  
503 genome.

504  
505 **RIP also drives genome compartmentalization and evolutionary stratification**

506

507 While mobile elements and genome defence mechanisms play a major role shaping  
508 the gene content of *P. erodens*, they are also a major source of evolutionary  
509 stratification. We surveyed evolutionary stratification by mapping the discordance of  
510 phylogenetic signal between contiguous single copy OGs using generalized  
511 Robinson-Foulds distances on overlapping sliding windows (Figure 3c). This  
512 approach shows that regions proximal to putative centromeres, especially those placed  
513 between two large LRARs show lower average phylogenetic discordance between  
514 OGs (Figure 3c), as well as an accumulation of non-synonymous mutations, shown as  
515 higher average dN/dS values (Figure 3c), and divergent average m1/m2 and m7/m8  
516 ratios (Supplementary material). This is coherent with the idea that areas proximal to  
517 centromeres show suppressed recombination (140–143) and significantly contribute  
518 to genome architecture (144). The proliferation of LRAR caused by the interaction of  
519 genome defence mechanisms (RIP) and the proliferation of mobile elements in AT  
520 rich regions, results in the development of polycentric chromosomes (145), which  
521 behave locally in a similar way as reported for more complex repeat based holocentric  
522 (146) chromosomes in plants. The proliferation of transposable elements is also  
523 increased in subtelomeric regions, which are also affected by RIP but show significant  
524 differences in behaviour and gene content compared to the rest of the genome.

525  
526 To study the differences across genomic regions we split the genome into three  
527 functional regions: subtelomeric, LRAR and general. The first category includes  
528 350Kb proximal to scaffold ends containing telomeric, including LRARs found  
529 within them. The second contains centromeric and non-centromeric large RIP affected  
530 regions including 30Kb on each flank. The third contains the rest of the euchromatin.  
531 These three regions differ significantly in their evolutionary and functional  
532 stratification (Figure 4). The subtelomeric regions have slightly higher average RF  
533 distances between single copy orthologs (Figure 4q), and although the dN/dS values  
534 (Figure 4r) are also lower the difference is not statistically significant. Meanwhile,  
535 while the difference between LRARs and the rest of the genome is not significant, the  
536 LRARs show a more bimodal distribution of metrics reflecting the presence of  
537 LRARs centromeric or proximal to centromeres and other regions that do not show a  
538 strong signal of reduced recombination, because they are younger or incorporate  
539 genes that relocated within TEs.

540  
541 The three regions differ in the extent to which they have been affected by different  
542 processes. The coding density is obviously lower in LRAR flanks than in the rest of  
543 the genome, while subtelomeric regions although often including LRARs have a  
544 slightly higher density than the rest (Figure 4c). Rare genes belonging to small OGs  
545 and orphan genes are significantly associated with subtelomeric regions (Figure 4d–  
546 e), while the density of missing genes is obviously higher in LRARs (Figure 4f). In  
547 contrast, while the three regions differ in the overall density of repetitive sequences  
548 (Figure 4k), the density of mobile elements is statistically similar in subtelomeric and  
549 LRAR regions (Figure 4j), a divergence that may result from the different extent to  
550 which the three regions are affected by the proliferation of different types of TEs  
551 (Figure 4l-p).

552  
553 Finally, the telomeric regions have a significantly higher density of genes related to  
554 carbohydrate metabolism (CAZymes, Figure 4g), secreted proteins (Figure 4h), and  
555 secondary metabolism clusters (Figure 4i) than the rest of the genome. Phylogenetic  
556 stratification of the genome is also observable across the dataset. Regions of reduced

557 and increased recombination are intermixed across the genome (Figure 3c) and are  
558 strongly associated with the presence of LRARs. This suggests that subtelomeric  
559 regions, which have increased recombination and are strongly associated with certain  
560 mobile elements, are key in the acquisition of functional diversity and adaptive traits.  
561 Furthermore, subtelomeric regions show higher average dissimilarity between single-  
562 copy OG phylogenies than the rest of the genome (Figure 4q) and slightly lower  
563 evidence for positive selection (Figure 4r–t). The scale at which stratification takes  
564 place is finer than the coarse regions used in this survey and its study requires an in-  
565 depth systematization to characterize the recombination history of individual  
566 chromosome regions.

### 567 3. DISCUSSION

568 Language provides us with the basic tools to imagine, organize and share our  
569 knowledge of the natural world. Taxonomists use a hierarchic system of linguistic  
570 categories to represent and organize the observable discontinuity of organic variation.  
571 For them, life is organized in discrete units, species, that are subject to a continuous  
572 process of evolutionary change and are connected through their shared ancestry.  
573

574 Reconciling the continuous nature of evolutionary change with the discrete outcome  
575 of speciation is a foundational challenge in evolutionary biology, which is becoming  
576 ever more apparent as the evidence that cross-specific exchange of genetic  
577 information is frequent piles up across all domains of life. Viewing species as only  
578 units of biological organization is often a useful compromise; flexible enough to  
579 allow interpreting lack of reproductive isolation in terms of interspecific hybridization  
580 and introgression. But to what extent is it a harmful simplification? Is it necessary to  
581 perpetuate an unrealistic *scala naturae* made up of fix categories and deterministic  
582 expectations? Life is a complex evolving system in which both genealogical and non-  
583 genealogical bonds are equally relevant in shaping its structure, diversity, variability,  
584 and stability.  
585

586 The lichen genus *Pyrenodesmia* provides a clear example of a genus whose species  
587 remain interlinked at a supra-specific level. The genus contains a discrete number of  
588 identifiable genetic entities which associate significantly with already described  
589 morphospecies, as well as several morphologically and genetically discordant  
590 specimens which amount to ca. 30% of the dataset. Some of them are unrecognized  
591 species, but others are clearly intermediates in their phenotype, their genotype, or  
592 both. The evidence that the identifiable genetic groups transfer genetic information  
593 with each other, as provided by admixture and gene flow (migration) analyses (Figure  
594 1a–e) could be interpreted in terms of hybridization or introgression between species  
595 resulting from secondary contact between well-differentiated species. However, in the  
596 European continent, all species are interconnected through mating in a single large  
597 reproductive network, a syngameon, despite which the main species remain largely  
598 distinct and distinguishable. Moreover, the phylogenetic (Supplementary\_material)  
599 and phylogenomic trees (Figure 3d, Supplementary\_material) reflect the presence of a  
600 long-standing history of genetic exchange more than a series of unresolved secondary  
601 contacts.  
602

603 Coherently with findings made on other syngamea, the contribution of the different  
604 species and gene pools to the hybrid signal is asymmetric at pre- and post-mating



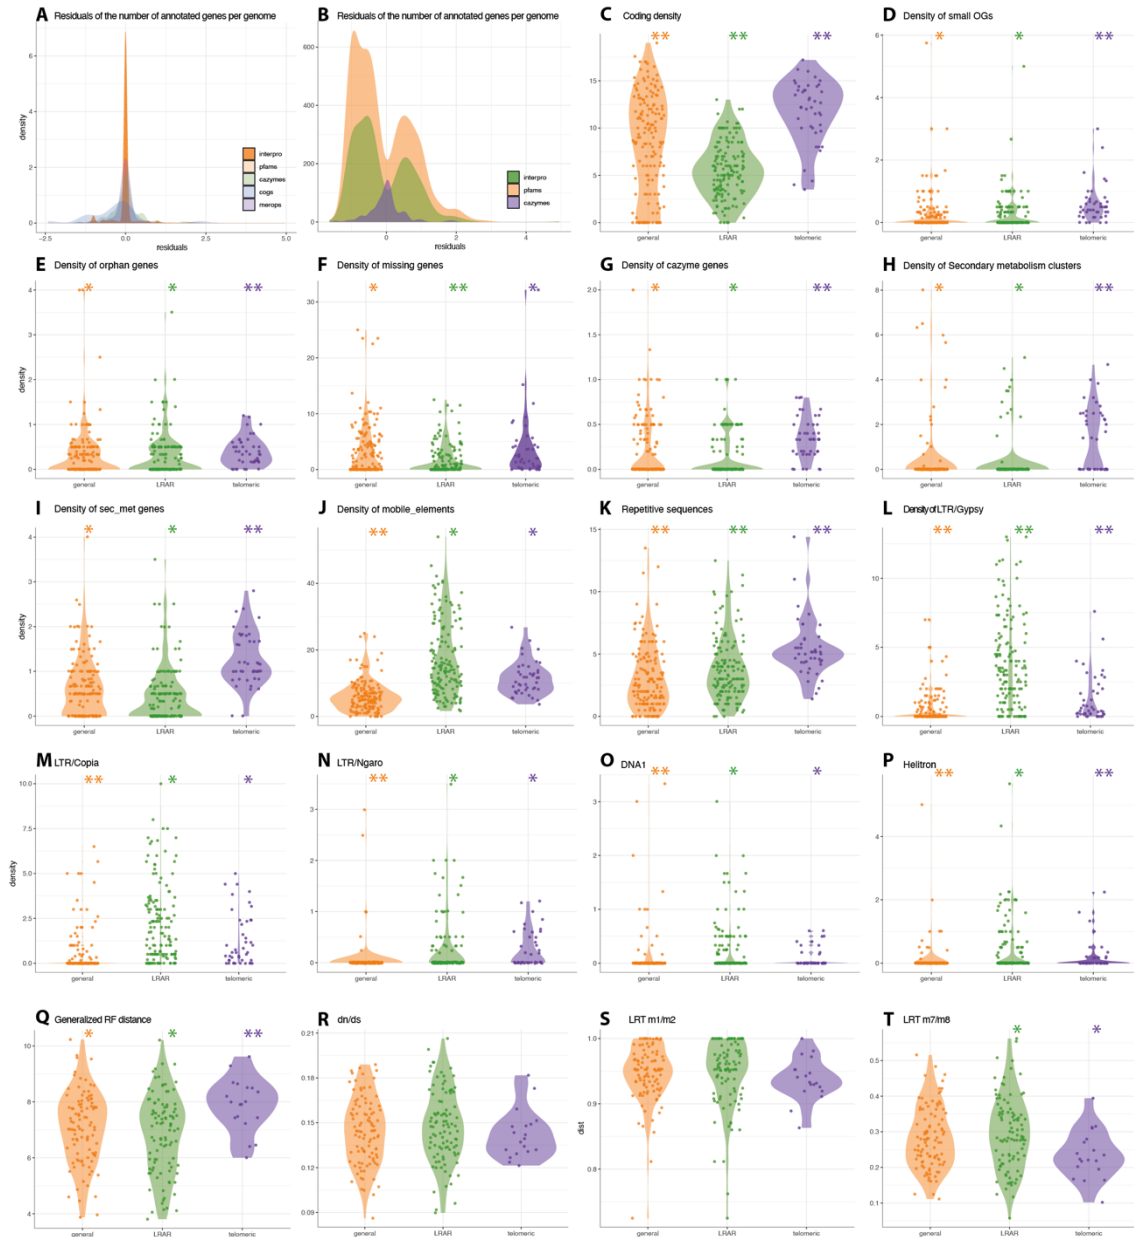

**Fig. 4** Intragenomic regionalization of the *P. erodens* genome. **a** | Density plot of the standardized residuals of annotated gene representation in the genome. It includes all genes which rendered a positive match to Pfam, Interpro, COG, Merops and DbCAN databases. The expected value was imposed as the median of all other Pyrenodesmia genomes. **b** | Density plot of non-zero standardized residuals of annotated genes. Highlighting the towards depauperation of gene content. **c-p** | Show the density of different genomic features in the three imposed regions, telomeric and subtelomeric, LRARs and their flanks and the rest of the genome. Densities were calculated using a sliding window of 20Kb: **c** | Coding density. **d** | Small OGs. **e** | Orphan genes (singleton OGs). **f** | Missing genes. **g** | CAZymes. **h** | Secondary metabolism clusters. **i** | Secreted proteins. **j** | mobile elements. **k** | Repetitive sequences **l** | LTR/Gypsy. **m** | LTR/Copia **n** | LTR/Ngaro **o** | DNA1. **p** | Helitron. **q-t** | Distribution of phylogeny based metrics averaged across groups of 20 neighboring OGs. **q** | Generalized Robinson-Foulds distances. **r** | Ratio of non-synonymous and synonymous substitutions ( $\omega = dN/dS$ ). **s** | Averaged value of the Likelihood Ratio Test between models m1, which considers loci being either conserved or neutral ( $\omega < 1$  &  $\omega = 1$ ), and m2, which include a third category allowing loci to be under positive selection ( $\omega < 1$ ,  $\omega = 1$  &  $\omega > 1$ ). **t** | Averaged value of the Likelihood Ratio Test between models m7 and m8. Both models consider that  $\omega$  varies across sites following a beta distribution restricted to the interval (0,1), model m8 includes an additional category of sites under selection which can take a value of  $\omega$  above 1.

605 levels. In *Pyrenodesmia*, cross-specific bonds seem to be driven by species that have  
606 reduced endolithic thalli (Figure 1a–f, Figure 2), and appear to be of hybrid origin in  
607 the phylogenomic reconstructions (Figure 3d), particularly *P. erodens* and *P. alociza*  
608 (gene pools 2,3). These are preferentially introgressed by larger epilithic species of  
609 gene pools 6–9). The observed asymmetry is even stronger when considering  
610 migration between gene pools using each mat idiomorph. The directionality of  
611 geneflow as estimated using migrate-n is difficult to interpret, especially because  
612 there is some discordance between gene pools and phenotype groups. Further  
613 evidence of the asymmetry is provided by the net difference in average closeness  
614 centrality estimated for the different mat modules (Supplementary material), and the  
615 strong contribution of *P. alociza* and *P. erodens* modules to the network structure.  
616

617 In terms of evolutionary ecology, there is no clearer contributor to fitness than mating  
618 itself. In that respect, syngamea could be interpreted to behave in a way analogous to  
619 metapopulations (metaspecies), where asymmetries in mating are strong drivers of  
620 both population structure and local adaptation. Contrary to metapopulations, geneflow  
621 between species may result not just in the acquisition of maladaptive traits, but have  
622 stronger selective consequences. In that respect, the diversity of reproductive  
623 interactions can be interpreted in terms of reproductive niche, transposing an Eltonian  
624 niche concept (147) to describe the width of the genealogical vicinity with which  
625 mating is possible. Seen from that perspective, mating behaves the same as any other  
626 biotic interaction. Species will show different degrees of reproductive specificity,  
627 from a very narrow reproductive niche as *P. chalybaea* to a generalist with fully open  
628 reproductive boundaries. An idea subsequent to that of niche, which is sometimes  
629 strongly discussed by ecologists, but is a central consideration is that the observed  
630 interactions result from the realization of a broader fundamental niche which may  
631 result from local processes such as competition or density. This would reconcile the  
632 discordance between the lack of compartmentalization and the strong association  
633 between the estimated modules, phenotypic species and region.  
634

635 The outcome of reproductive interactions may also be interpreted in terms of their  
636 effect on both mates, which can be beneficial by increasing the transfer of adaptive  
637 traits to deleterious in case of, for instance genome or mitonuclear incompatibilities.  
638 In that respect we hypothesize that the strategy of the endolithic *Pyrenodesmia*  
639 species is analogous to sexual parasitism (148), which use closely related species to  
640 propagate, at the expense of certain gene leakage between species and some  
641 backcrossing leading to hybrid phenotypes. It is not necessary to annihilate the  
642 accepting genotype to be parasitism, but simply to increase its own fitness at the  
643 expense of the other species in the syngameon. Compared to other models of sexual  
644 parasitism, fungi are different because of the meaning of mating and the haploid  
645 nature of the vegetative mycelium. The outcome of hybridization is not completely  
646 known, but it is not necessary Mendelian, especially because hybrids result in a whole  
647 probabilistic spectrum of partially recombined haploid genotypes.  
648

649 As genomes diverge and species within the syngameon diversify, hybridization comes  
650 at a stronger cost to both sides of the interaction. The genomes of sexual parasites  
651 must reflect the deleterious effects of non-specific mating at genome level but also the  
652 traits selected to maintain the feedback loop in which maintaining the increased  
653 fitness of the parasitic behaviour overweighs any other adaptive strategy.  
654

655 In the phylogenomic dataset we observe two species which show different traits  
656 related to their hybrid history. The genome of the *P. erodens* culture seems to reflect  
657 the long term outcome of hybridization. Its genome shows traces of genome  
658 stabilization. We do not know whether the higher chromosome number results of  
659 hybridization or is a shared trait within the genus. Its gene content remains quite  
660 stable despite hybridization, although partial gene loss is observable across the whole  
661 genome. The loss of genes is mostly caused by the action of genome defence  
662 mechanisms, especially RIP, which disproportionately affects certain scaffolds and  
663 chromosomes to the point of completely obliterating their gene content. This  
664 asymmetry is not typical of RIP and cannot be explained by the observed proliferation  
665 of transposable elements alone. This makes us conclude that RIP, in interaction with  
666 other genome defence mechanisms is a key factor maintaining fungal genomes  
667 haploid and driving concertation of gene content in hybrid genomes.

668  
669 The accumulation of large RIP affected regions (LRARs) also modifies the  
670 recombination landscape of the *Pyrenodesmia* genomes, because it generates regions  
671 of reduced recombination between LRARS that likely behave as centromeres (Figure  
672 3c). These provide certain protection from the deleterious effects of recombination  
673 and may contribute to the overall stability of the genome but are on the long run prone  
674 to accumulate non-synonymous mutations (Figure 3c). Meanwhile the subtelomeric  
675 regions of the genome remain active both in terms of recombination and incorporation  
676 of mobile elements, retaining a strong potential for the acquisition of functional  
677 variability (Figure 3–4). The loss of certain genetic elements like heterokaryon  
678 incompatibility genes, as observed in *P. erodens* is a potential mechanism to increase  
679 cross-reproductive fitness, while the reduction in tRNA content may provide  
680 additional transcriptional silencing of foreign genes.

681  
682 The genomes of *P. alociza* on the other hand appear as recent hybrids. They show  
683 increased genome content and tRNA count, but are difficult to interpret because they  
684 do not originate from a haploid tissue and may not represent accurately the real  
685 genomic structure. They do hint to a first stage in hybridization in which genome  
686 stabilization is still an ongoing process, which requires a more in-depth look.

687  
688 On the whole, this survey raises worrying questions on the way phylogenetic surveys  
689 interpret the genetic variability of fungi. Is the supraspecific evolutionary unit found in  
690 *Pyrenodesmia* an exception? Most likely it is not, and while molecular characters  
691 provide an objective description of the relatedness between genes, and organisms, the  
692 methods used impose very strong opinions on the interpretation of relatedness, the  
693 outcome of evolution and the properties of populations and species. To what extent are  
694 we doing a good job describing fungal evolution in terms of hyperdiversity and cryptic  
695 speciation? How much are we affected by confirmation bias? Or are we assuming  
696 simplistic operational expectations because they are publishable?

#### 697 4. MATERIAL AND METHODS

##### 698 ***Dataset assembly, collections and morphological identification***

699 We assembled a collection of *Pyrenodesmia* specimens growing mainly on limestone  
700 surfaces across the Mediterranean region of the Eurasian continent. These were  
701 enriched with reference collections made in Central Asia and North America. Sample

702 location is shown in ST 1. The identification of the specimens using morphological  
703 characters is a daunting task. The univocal identification of specimens to one taxon is  
704 often hampered by the lack of clear differentiation, the abundance of intermediate forms  
705 and the difficulty to carry barcoding using molecular characters. In general terms we  
706 used the monographic work of Wunder (96) as a backbone over which we integrated  
707 newer taxa and taxonomic concepts (97, 99, 101, 102, 105). This effort has been largely  
708 summarized by Frolov et al. (106).

709

### 710 ***Development of specific primers***

711 The assembly of a multilocus dataset proved particularly challenging. Added to the  
712 species identification problems, the microscopic nature of most species hampered the  
713 process of DNA extraction. This is especially true for endolithic samples which have  
714 low fungal biomass and high amounts of Calcium carbonate. In most cases the yield  
715 sufficed to amplify repeated loci as ITS or mtLSU, but not single-copy nuclear loci, a  
716 problem exacerbated by the mediocre performance of standard fungal-specific primers.  
717 To enable the assembly of a multilocus dataset we developed specific primers for  
718 *Pyrenodesmia*. Instead of developing primers internal to those used as standard, we  
719 aimed at providing Teloschistaceae/*Pyrenodesmia*-specific primers covering a larger  
720 genomic region, more in tune with modern PCR and sanger sequencing capabilities.  
721 For this we assembled nine reference genomic drafts to serve as reference and to test  
722 the usability of genome-wide phylogenomic surveys. We queried the assembled loci  
723 using Blastn (149) as to extract complete sequences of a set of loci commonly used in  
724 previous phylogenetic surveys at generic and family levels: The mitochondrial large  
725 subunit rRNA (mtLSU), the nuclear Internal transcribed spacer region of the rRNA  
726 cistron (ITS), and five protein coding loci: mini-chromosome maintenance complex  
727 protein 7 (*mcm7*), Elongation Factor  $\alpha$  (*Ef $\alpha$* ),  $\beta$ -Tubulin, and the largest subunits of the  
728 RNA polymerase II (*RPB1* and *RPB2*).

729 Further subsetting, multiple sequence alignment and primer design were carried out in  
730 Geneious v7 (150) using the included augustus (151) and Primer3 plugins. Multiple  
731 sequence alignments contained a single gene copy per genome with the exception of  
732 ITS and mtLSU, and all belonged to contigs predicted as fungal. To provide more  
733 specific primers for mtLSU, which is prone to cross-contamination, and to exclude the  
734 photobiont sequences in ITS we included contaminant sequences of lichen-associated  
735 fungi and *Trebouxia* photobionts as found in the sequenced metagenomes.

736

### 737 ***PCR and sequencing***

738 Because standard PCR protocols did not deal well with the low quantities of DNA used,  
739 PCRs were carried out using the KAPA3G Plant PCR Kit (Kapa Biosystems, VWR)  
740 using the following cycling conditions for the phylogenetically informative loci: Initial  
741 Denaturation at 95°C for 5 minutes, 40 cycles of Denaturation at 95°C for 20s,  
742 Annealing at 57°C for 15s, Extension at 72°C for 30s and a Final Extension step at 72°C  
743 for 7m. For the MAT loci 40 cycles of Denaturation at 95°C for 30s and annealing at  
744 60°C for 15s were used instead.

745 All reactions were carried out using 10  $\mu$ L reaction volumes. The mastermix was  
746 modified to include: 5  $\mu$ l 2x KAPA Plant PCR Buffer, 0.7  $\mu$ l Forward Primer (10  $\mu$ M)  
747 and 0.7  $\mu$ l Reverse Primer (10  $\mu$ M), 1-3 $\mu$ l Template DNA, 0.05  $\mu$ L KAPA3G Plant  
748 DNA Polymerase (2.5 U/ $\mu$ L), fill up to 10  $\mu$ l with PCR-grade water. Sanger sequencing  
749 was carried out by Microsynth Austria on an ABI 3001 platform.

750

## 751 ***Dataset assembly***

752 Although more than 1200 specimens were processed, the final dataset includes 824  
753 specimens for which we could assemble a credible and almost complete data-matrix  
754 (98%), with sequences of at least three out of the five loci used. To achieve the  
755 maximum completion of the dataset we repeated the amplification and sequencing  
756 progressively increasing the amount of template until the gaps were filled or the extract  
757 was exhausted. The microscopic nature of most samples did not allow doing multiple  
758 extractions per sample; in consequence sequences are never pooled from parallel  
759 extractions. The dataset used in the manuscript does not make use of mtLSU nor RPB2  
760 sequences, but we provide for coherence with previous surveys that may have RPB2 or  
761 mtLSU. The mitochondrial LSU was discarded as it contains two complementary  
762 homopolymeric regions that degrade the performance of Sanger sequencing beyond the  
763 limits of usability. Additionally, we suspect the complex reproductive biology to cause  
764 significant mitonuclear discordance and heteroplasmy. The two overlapping fragments  
765 of a long region of RPB2 were the last to be sequenced and remain very incomplete due  
766 to the exhaustion of DNA extracts.

767 All sequences were processed in Geneious v.11 (152) departing from the raw .ab1 files.  
768 After a first alignment using mafft (151), sequences were trimmed, and base calling  
769 errors were manually corrected. Correction was aided by the simultaneous graphic  
770 visualization of the electropherograms and DNA alignment. Each sequence was  
771 processed the same way, corrections were made conservatively and tend to equalize  
772 non-variable sites but leave ambiguous calls in informative ones. Many sequences  
773 required extensive editing; in most cases the sequencing artefacts were systematic  
774 issues, caused by PCR errors and low template concentrations. In most cases sequences  
775 were obtained using reverse and forward primers, instead of enforcing the creation of a  
776 consensus contig assembly, we manually merged both senses during the correction step.  
777 The process of dataset assembly was iteratively repeated as new sequences were added.

778

## 779 ***Extent of the multilocus dataset***

780 We assembled a wide phylogenetic dataset including 824 lichen specimens and five  
781 sanger-sequenced nuclear loci (Tables S2-S4). Most specimens correspond to  
782 saxicolous species collected on limestone substrates across Southern Europe (Table S1,  
783 Figure S1). A subset of genetically divergent Central Asian and North American  
784 species to provide a broader phylogenetic context. The use of custom primers (Table  
785 S2) allowed us to assemble a 98% complete phylogenetic dataset. To deal with  
786 ambiguous basecalling caused by having partly dikaryotic specimens, the dataset was  
787 phased and concatenated into a data matrix including 910 phased haplotypes.

788

## 789 ***Taxonomic credibility***

790 After the datasets are assembled and aligned, their taxonomic consistency is assessed  
791 by several means. First, sequences of each locus are blasted against a local copy of the  
792 NCBI nt database (downloaded 3.2017), the resulting text output is processed in  
793 MEGAN v5 (153, 154) to obtain an estimate of the Least common ancestor for each  
794 sequence. Samples containing foreign sequences or with a dubious adscription were  
795 excluded from the dataset. Because of the different representation of the loci in the  
796 NCBI database, the ITS, mtLSU and BT sequences are identified at least at a subfamily

797 level (Caloplacoideae), the *mcm7* sequences could be assigned to belong to the  
798 OSLEUM clade, while *Efa*, RPB1 and RPB2 could not be filtered taxonomically, and  
799 we relied on phylogenetic reconstructions for cleaning foreign sequences.

800

### 801 ***Phasing of mixed sequences***

802 The base calling of sanger sequences when using difficult material is often  
803 unsatisfactory, and often results in sequences containing numerous ambiguous sites. It  
804 is common practice in phylogenetic surveys, to retain ambiguous sites in the dataset  
805 when the overall sequence quality is high, since they have little influence on the  
806 topology, especially when used in a concatenated data matrix.

807 Base calling, being an automated process, does not take into account the process  
808 causing an ambiguous signal (e.g. primer degradation, presence of homopolymers,  
809 heterozygotic samples, paralogs, etc.). In datasets containing both intra and  
810 interspecific variability, like the one used, a single isolate may contain multiple variants  
811 in haploid or dikaryotic hyphae. This means that ambiguous sites accumulate in  
812 phylogenetically informative sites, significantly degrading the interpretation of the  
813 data. To avoid this type of dataset erosion we decided to curate sequences individually  
814 and carry out context-based haplotype inferences.

815 Upon the reception of sequence data, 1) forward and reverse sequences of the same  
816 specimen sequences were added and aligned to the data matrix in Geneious v7 using a  
817 fast MAFFT algorithm. 2) Using the electropherograms as context, low quality regions  
818 were eliminated and only high-quality fragments were used. 3) When high quality  
819 fragments did not cover the whole length of the sequence, they were repeated and  
820 appended to the alignment. 4) When forward and reverse sequences were properly  
821 overlapping and the context did not suggest a chimeric sequence was being created, all  
822 sequences were manually collapsed into one consensus. 5) Some samples however  
823 showed either different forward and reverse sequences or more often ambiguities  
824 reflecting a mixture of sequences similar to those existing in the dataset. In this case  
825 more than one sequence per sample was left in the alignment and the curated sequences  
826 were used to call phased haplotypes.

827 Most loci contained few mixed sequences and haplotypes could be phased manually.  
828 Four samples of ITS were mixed as well as two of RPB1, 12 of *EF- $\alpha$*  and 21 samples  
829 of  $\beta$ -tubulin. The mating type loci had also some mixed samples, 12 in *mata* and five  
830 in *hmg*. The nuclear *mcm7* locus, however showed 80 samples which were clearly  
831 mixed and difficult to phase manually.

832 The genome assemblies showed no duplication of the *mcm7* locus in *P. erodens*, in the  
833 assembly or looking at the patterns of Heterozygosity obtained by read-mapping.  
834 Haplotype phasing was carried out using the algorithm implemented in the program  
835 Phase v 2.1 (155–158); the input/output interface between alignment files and Phase  
836 was provided by fastphase (159).

837 To incorporate phased sequences into the population analyses, individual specimens  
838 with duplicated sequences in one locus were duplicated in all other datasets for  
839 population analyses. Haplotype phased specimens were treated as separate haploid  
840 entities and not as diploid in downstream population inferences. A total of 86 samples  
841 are duplicated in the final data matrix.

842

### 843 ***Pylogenetic reconstructions, consensus and hybridization networks***

844 Phylogenetic reconstruction on the duplicated dataset were carried out using iqtree  
845 (160) for Maximum Likelihood reconstructions and BEAST v2.2 (161) for Bayesian  
846 reconstructions. Initial selection of substitution models and partitions was carried out  
847 using the model testing capabilities of IQtree (162). The ML topologies of the five  
848 somatic loci were summarized using a majority rule consensus calculated in RaxML  
849 (163, 164). Dendroscope v3 (165) was used to explore alternative consensus  
850 algorithms. Consensus networks captured best the phylogenetic incongruence between  
851 loci, we show the cluster network consensus and k-levels network. Pairwise  
852 hybridization networks were also used an hybridization number was estimated.

853

854 Bayesian reconstructions were carried out as a previous step for bGMYC (166), so a  
855 constant size coalescent model was used for each locus, which represents a conservative  
856 approach for the further the GMYC analysis. A strict clock and the substitution models  
857 selected in IQtree were also used.

858

### 859 ***Species delimitation***

860 To estimate the number of putative phylogenetic species based on single loci we used  
861 a multitree implementation of the General Mixed Yule Coalescent method as  
862 implemented in R package bGMYC(166). We chose a subset of 50 equally spaced trees  
863 from the posterior tree distribution of a Bayesian analysis using a constant size  
864 coalescent tree model. For each tree 500 alternative delimitations were obtained using  
865 a mcmc of 50K samples after burn-in of 40K iterations. A larger number of trees could  
866 not be used due to the large size of the dataset. The median number of species across  
867 all 2500 replicates is provided (Table S3). A consensus assignment was obtained using  
868 after summarizing the alternative bGMYC solutions as a coassignment matrix. This  
869 was converted to a dissimilarity matrix and processed using an iterative k-medoid(167)  
870 clustering method as implemented in function *pamk* of R package *fpc* (168). We  
871 imposed a search between 1 and 100 clusters and used the default average silhouette  
872 width criterion for the selection of the optimal number of groups. For the sake of  
873 visualization single locus clusters were also calculated using a maximum value of K of  
874 10 or 15 clusters (Figures S2–S12). Additionally, we used single and multiple threshold  
875 GMYC(55) analyses for comparison, carried out using the consensus topology of the  
876 Bayesian analyses. Finally simpler OTU delimitations using the distance based  
877 ABGD(56) and ASAP(169) methods are provided (Table S2).

878 Using multilocus methods of species delimitation and discovery such as Tr2(170),  
879 SpedeStem (171) and Stacey (172) was the original aim of the survey. These require  
880 that species are either not connected through geneflow or need a putative delimitation  
881 to be used as starting point, which in our case is not readily attainable.

882 A multilocus interpretation of the bGMYC analyses is provided instead, making use of  
883 the obtained coassignment matrices. Each matrix summarizes the delimitation across  
884 multiple trees and replicates per locus as the probability that each pair of tips are  
885 assigned to the same cluster/putative species. Assuming that loci are not linked, and the  
886 species assignments are independent, the probability that two tips are coassigned across  
887 loci can be summarized two ways, as the average coassignment probability (average)  
888 or as the probability that two tips are coassigned in one or another locus, using the  
889 polynomial extension of  $p(A \text{ or } B) = p(a) + p(b) - p(ab)$ . The resulting pooled  
890 coassignment matrix was converted to a dissimilarity matrix  $(1-x)$  and clustered using  
891 a k-medoids method as implemented in function *pamk* of package *fpc*. Selection of k  
892 was automated using an average silhouette width as criterion.

893

## 894 ***Inference of gene pools***

895 Gene pools were estimated using BAPS(125). All loci were imported as concatenated  
896 alignments, duplicated sequences were included as independent haploid entities and not  
897 as diploid/polyploid data. Multilocus mixture clustering was carried iteratively using  
898 20, 30, 50, 60, 80, 100, 150, 200 and 220 as maximum number of clusters. All analyses  
899 using a codon linkage model converged in identifying 10 genepools, using a less  
900 adequate linear linkage model, ten and eleven were equally likely solutions. The  
901 contribution of the different clusters under an Admixture model was calculated in an *a*  
902 *posteriori* run based on the precomputed mixture clusters. Finally the dataset was  
903 deduplicated in R. The proportions belonging to admixture fractions were recalculated,  
904 and the assignment to mixture clusters reinterpreted from the largest Admixture  
905 proportion. This deduplication did not alter the assignment to mixture clusters, but  
906 changed the admixture proportions.

907

908 The association between morphospecies and gene-clusters was surveyed using  
909 contingency tables and chi-square and statistical co-independence tests as implemented  
910 in R package vcd (173, 174). The geographic distribution of cluster assignment was  
911 mapped using R packages ggplot2 (175), rnatuarearth and rnatuarearthdata(176) .

912

## 913 ***Estimating geneflow between gene pools***

914 Geneflow between genepools was estimated using migrate-n v. 3.6.11 (177–180)  
915 Sampled specimens were clustered according to the assignment to mixture gene-pools  
916 estimated in BAPS, the connection matrix was imposed to be complete and initial  
917 values of theta and M were estimated from Fst table. A Bayesian estimation method  
918 was imposed using four incrementally heated chains (1,1.5,3,10K) and no swapping as  
919 it was intended for model selection. Each long chain is composed of 10M iterations in  
920 10 replicate chains each with a burnin of 1M generations and 1M generations sampled  
921 every 100<sup>th</sup> step. The results were tabulated and plotted in R using package igrph  
922 (CITE). The analyses were run using mutationally scaled population size and migration  
923 rate parameters. To interpret the data M was multiplied by the immigrated population  
924 size to obtain the number of migrants per generation 2Nem. We considered a  
925 conservative 2 migrants per generation as a significance threshold for plotting.

926

## 927 ***Targeting MAT loci***

928 In addition to the phylogenetically informative loci mentioned above, we developed  
929 specific primers for the mating type gene idiomorphs (MAT) using in the genome draft  
930 assemblies. To identify the MAT region we used a similar BLAST approach, but we  
931 included as target sequences both MAT 1.1.1 and MAT 1.1.2 genes as well as the  
932 flanking proteins SLA2 and APN2 from other Lecanoromycetes species. We identified  
933 all assemblies to be heterothallic and found no evidence of having both idiomorphs  
934 present in different parts of the genome (homoeothallic or pseudohomoeothallic).  
935 Heterothallism was further confirmed by mapping the raw reads back to the MAT  
936 regions of each idiomorph. Specific primers were developed to cover informative  
937 fractions of the MAT.1.1.1 or MAT $\alpha$  gene as well as the gene of the HMG MAT 1.1.2  
938 gene. Newly developed primers are summarized in (ST\_2 primers).



939

## 940 ***Phylogenetic diversity and cophylogenetic analysis of MAT genes***

941 Nucleotide sequences of the two MAT idiomorphs (alpha and hmg) were used in the  
942 same way as the phylogenetic loci. Cophylogenetic analyses of mating type genes was  
943 carried out using two closely related methodologies aimed at interpreting  
944 cophylogenetic patterns in large data matrices implemented in R packages Paco and  
945 Random Tapas (128, 129). Both methods largely rely on using the Gini coefficient  
946 (181, 182) to measure the inequality among the values of the residual frequency  
947 distribution obtained using using procrustean superimposition of the host and  
948 symbiont matrices in Euclidean space. A Gini coefficient of 0 expresses perfect  
949 equality, where all values are the same, while a Gini coefficient of 1 (or 100%)  
950 expresses maximal inequality among values. To run cophylogenetic analyses on such  
951 a highly diverse dataset, required collapsing the nucleotide dataset. To simplify the  
952 analyses and retain the distinction between nucleotide and aminoacid datasets,  
953 idiomorph alignments were collapsed to OTUs using a conservative ABGD run,  
954 resulted in a matrix containing 243 alpha and 225 hmg OTUs respectively.  
955 Phylogenetic ML trees were pruned to include a representative sequence per distance  
956 cluster.

957

## 958 ***Network analysis of MAT idiomorph distribution***

959 Nucleotide sequences of the two MAT idiomorphs (alpha and hmg) were translated to  
960 aminoacid sequences in Geneiousv7, using the alignment to a complete genomic  
961 reference as reading frame reference. Aminoacid sequence alignments were imported  
962 into R using package phangorn, where they were collapsed into haplotypes. Haplotype  
963 datasets were collapsed to 99, 97 and 95% similarity clusters using Cd-HIT (133, 183,  
964 184). The resulting cluster assignments were imported into R, where the occurrence of  
965 idiomorph haplogroups per specimen were tabulated.

966

967 The table of idiomorph association at individual level was used to generate a unipartite  
968 graph using igraph v.1.3.2 (132). To identify reproductive compartments in the  
969 network, we first partitioned it identifying its maximal connected components (i.e.  
970 compartments). Further, modularity was estimated using four alternative algorithms:  
971 walktrap (185), louvain (134), labelProp (186) and infomap (187). Alternative partitions  
972 were validated and compared using the methodology implemented in R package *ROBin*  
973 (188). Alternative partitions are compared in terms of their stability against increasing  
974 levels of random perturbation, measured using the Variation of Information metric (VI)  
975 (189). Model comparison was carried out using the Gaussian Process ranking method  
976 for time series implemented in package *geprege* (190). A key limitation of the used  
977 methodology is its dependence on the adequacy of the randomized networks used as  
978 null models. We explored two alternative randomization approaches based on the  
979 observed network. The configuration model (CM) implemented in random function of  
980 package *Robin* generates a random graph with the same degree sequence as the original  
981 but with a randomized group structure. Meanwhile the program *RandNetGen* (136) was  
982 used to generate a random graph based on the dk-series 2.1 model, which preserves the  
983 joint degree distribution and the clustering coefficient of the original network but not  
984 the full clustering spectrum.

985

986 Alternatively, the idiomorph table was processed as a bipartite network using package  
987 bipartite (131, 191). Network compartmentalization was estimated using function  
988 *compart*, and modularity was surveyed using function *computeModules*. The network  
989 structure and the differences between levels were calculated using functions  
990 *networklevel* and *classlevel*.

991

## 992 **Genomic sequencing assembly and annotation**

993 The genome of *Pyrenodesmia erodens* was sequenced using material from axenic  
994 culture; all other genomes have been assembled from metagenomic libraries of  
995 complete thallus fragments. Library construction and sequencing were outsourced to  
996 the High-Throughput Genomics and Bioinformatic Analysis center of the Huntsman  
997 Cancer Institute of the University of Utah (Salt Lake City, UT). The reference genome  
998 of *P. erodens* was assembled using two libraries, a paired-end sequencing library  
999 constructed using the TruSeq DNA PCR-Free sample preparation kit (Illumina) with  
1000 an insert size of 550bp, and a mate-pair library constructed using Nextera Mate Pair  
1001 Library Preparation Kit (Illumina) sequenced using three target insert sizes 3Kb, 5.3Kb  
1002 and 10Kb.

1003

1004 For the metagenomic libraries we used either TruSeq DNA PCR-free (Illumina) or nano  
1005 kits (Illumina) depending of the DNA yield of the isolation process in any case using a  
1006 more conservative 350bp insert size. All libraries were sequenced using a HiSeq 125  
1007 cycle paired-end sequencing v4 protocol using two lanes of an Illumina HiSeq-2000  
1008 platform.

1009

1010 The quality of the resulting libraries was quantified using fastqc (192). They were  
1011 quality trimmed and filtered using trimmomatic (193), and assembled using spades v  
1012 3.6.2 (194). Quality and completeness were assessed using quast (195) and busco (196).  
1013 For *P. erodens* we evaluated missassemblies graphically by mapping mate-pair libraries  
1014 onto the assembled genome. We identified several problematic regions, especially  
1015 around large homopolymer repeats (polyC). These were manually split and  
1016 rescaffolded using sspace v2(197).

1017

1018 Lichen metagenomes were assembled using spades v 3.6.2 (194) using the algorithm  
1019 for isolates. Additional metagenome assemblies, metaspades and megahit were used  
1020 for cross-validation. Metagenome assemblers were used but discarded as their intended  
1021 use is beyond that of this manuscript. algorithms were also employed, but were  
1022 ultimately discarded. Although several alternative metagenome assembly algorithms  
1023 were tried, isolate but in addition alternative approaches were also metagenome  
1024 assemblers. Fungal scaffolds were identified using a custom strategy implemented in R  
1025 (SUPPLEMENT). The graphic strategy akin to that used in a blobology approach  
1026 makes use of k-mer coverage, length and GC content to plot the sequencing distribution  
1027 of scaffolds. Decision on the origin of each assembled scaffold was made using  
1028 sequence comparison strategies and different sources of evidence. A nucleotide blast  
1029 was carried out against the reference genome (*P. erodens*) using blastn (198); diamond  
1030 (199) was used for nucleotide to protein alignments (blastx) using a dataset of  
1031 publically available Lecanoromycete proteins (*Xanthoria parietina*, *Cladonia uncialis*  
1032 and *P. erodens*) as well as against a copy of the ncbi's nr dataset (DATE). The blast  
1033 results were analyzed using megan v5 (200) to obtain a taxonomic assignment. Finally  
1034 the presence of Lecanoromycete single copy orthologs was evaluated using busco

1035 (201). The different lines of evidence were concatenated in a binary string, including  
1036 whether the nucleotide blast was positive or not, whether the blastx was positive or not  
1037 and if any of the hits were the best hits for a particular reference protein in the database,  
1038 whether the scaffold was identified as fungal or Lecanoromycete and whether  
1039 Lecanoromycete buscos were identified. The process continued onto gene prediction  
1040 and annotation as described below. After a first round of gene prediction and functional  
1041 annotation, genomes were additionally filtered to eliminate minor scaffolds containing  
1042 only proteins identified as being of bacterial origin using the eggNOG (202) database  
1043 and eggNOG-mapper (203).

1044

1045 Gene prediction and annotation of the *P. erodens* genome differs from the rest of the  
1046 genomes. In general we used the funannotate v(1.7.4) (204) as the main analytical  
1047 pipeline to mask the genome, carry out gene prediction and annotation. Because we had  
1048 no RNA evidence to train gene models, gene prediction was purely based in preexisting  
1049 protein databases, RefSeq (205) and the specific lichen protein database used for  
1050 filtering including the proteins identified in the *P. erodens* genome. The latter genomic  
1051 draft was initially annotated using the Maker v3 (206) pipeline and and Bast2GO (207).  
1052 A first set of proteins was used as an additional source of evidence for the final gene  
1053 prediction, which used the funannotate pipeline (204) to keep coherent with the rest of  
1054 the survey. Differently to the proposed strategy implemented in funannotate we opted  
1055 to carry out EggnoGmapper (203) Interproscan (208) Antismash (209) certain analyses  
1056 independently and later integrate them into funannotate. Funannotate compare was used  
1057 to obtain a first tabulate of genome features across the dataset. Antismash results were  
1058 further explored to find Biosynthetic Genes using similarity clustering as implemented  
1059 in bigScape (210). Synteny was explored using multiple collinearity criteria as  
1060 implemented in MCScanX (211). Ripping was surveyed using the TheRipper online  
1061 tool (212). The presence of repetitive and mobile elements in the unmasked genomes  
1062 was carried out using Repeatmasker/modeler (213) and the last publicly available  
1063 repbase database (214). Additionally, protein motifs found associated with giant mobile  
1064 elements (215) were searched individually using blast (149)alignments.

1065

### 1066 ***Phylogenomic inference***

1067 Predicted protein sets were processed in Orthofinder (216) which was used to identify  
1068 Orthogroups and single copy orthologs (OGs). The OG aminoacid alignments were  
1069 used to query the corresponding mRNA sets, using gene names, which were put  
1070 together using a simple R script. Nucleotide alignments per OG were then carried  
1071 out using mafft (151) in Auto mode and trimmed using trimal (217).

1072 Single gene trees were calculated in iqtree (218) using bootstrap replicates to obtain  
1073 nodal support values. ML topologies were compiled into a single file and processed in  
1074 raxml (163) to generate a consensus and calculate internode centrality and tree  
1075 certainty support values (IC/TC) (219, 220). A cluster network consensus was  
1076 estimated in dendroscope (165), where pairwise hybridization networks (121)  
1077 And hybridization numbers were also calculated.

1078

### 1079 ***Data exploration in R***

1080 Genome annotation data were imported into R, explored and visualized using  
1081 functions implemented in the karyoploteR (221) and GenomicRanges (222) packages  
1082 for both visualization and summary. The genomic dataset was split into three range

1083 sets. First, telomeric and subtelomeric regions were taken out. We chose as  
1084 subtelomeric the terminal 250Kb of scaffolds where telomeric repeats were identified.  
1085 Second LRARs not contained within telomeric regions were taken out. They were  
1086 extended to cover an additional 30Kb on each flank, overlapping ranges were merged.  
1087 The remaining ranges were considered as the general coding fraction. The density of  
1088 genomic features was estimated using function *kpPlotDensity* and a window size of  
1089 50Kb. Differences in density across sliding windows between genomic were  
1090 visualized using violin plots in *ggplot2*. Differences between regions were tested  
1091 using pairwise Wilcoxon rank sum test with continuity correction. The loss of genes  
1092 within syntenic blocks was obtained by parsing the output of MCScanX. The overall  
1093 influence of the density of mobile elements on the estimated gene loss was modelled  
1094 using *glm* Poisson regression. Further visualizations were carried out using package  
1095 *circlize* (223).

### 1096 **Reproducibility and data availability**

1098 All datasets, scripts and supplementary materials are organized as Rmarkdown  
1099 documents [https://github.com/ferninfm/pyrenodesmia\\_phylogenomics](https://github.com/ferninfm/pyrenodesmia_phylogenomics) and  
1100 [https://github.com/ferninfm/pyrenodesmia\\_phylogenetics](https://github.com/ferninfm/pyrenodesmia_phylogenetics). They are provided as html  
1101 and pdf files but can also be compiled for reproducibility. Sanger-sequenced data has  
1102 been made available through NCBI's genebank under accession numbers XXXXX-  
1103 XXXXX. Short read files and assembled genomic drafts are made available under  
1104 Bioproject #XXXXXX and Biosamples #XXXXXX #XXXXXX.

## 1105 5. REFERENCES

- 1106 1. R. C. Lewontin, “The Units of Selection” (1970), (available at  
1107 [www.annualreviews.org](http://www.annualreviews.org)).
- 1108 2. S. J. Gould, E. A. Lloyd, “Individuality and adaptation across levels of  
1109 selection: How shall we name and generalize the unit of Darwinism?” (1999),  
1110 (available at [www.pnas.org](http://www.pnas.org)).
- 1111 3. E. Bapteste, P. Lopez, F. Bouchard, F. Baquero, J. O. Mcinerney, R. M.  
1112 Burian, Evolutionary analyses of non-genealogical bonds produced by  
1113 introgressive descent. *PNAS*. **109**, 18266–18772 (2012).
- 1114 4. K. de Queiroz, Different species problems and their resolution. *Bioessays*. **27**,  
1115 1263–9 (2005).
- 1116 5. K. de Queiroz, Ernst Mayr and the modern concept of species. *Proc Natl Acad*  
1117 *Sci U S A*. **102**, 6600–6607 (2005).
- 1118 6. K. de Queiroz, Species concepts and species delimitation. *Syst Biol*. **56**, 879–86  
1119 (2007).
- 1120 7. E. T. Steenkamp, M. J. Wingfield, A. R. McTaggart, B. D. Wingfield, Fungal  
1121 species and their boundaries matter – Definitions, mechanisms and practical  
1122 implications. *Fungal Biol Rev*. **32** (2018), pp. 104–116.
- 1123 8. James Mallet, A species definition for the Modern Synthesis. *Tree*. **10**, 294–  
1124 299 (1995).
- 1125 9. J. Huxley, *Evolution, the Modern Synthesis* (Allen and Unwin, London, 1942).
- 1126 10. B. Mishler, The morphological, developmental, and phylogenetic basis of  
1127 species concepts in bryophytes. *Bryologist, The*. **88**, 207– 214. (1985).
- 1128 11. E. O. Wiley, The Evolutionary Species Concept Reconsidered. *Syst Zool*. **27**,  
1129 17 (1978).

- 1130 12. E. Mayr, W. B. Provine, Eds., *The Evolutionary Synthesis: Perspectives on the*  
1131 *Unification of Biology* (Harvard Univ. Press, Cambridge, MA, 1980).
- 1132 13. J. C. Avise, K. Wollenberg, Phylogenetics and the origin of species. *Proc Natl*  
1133 *Acad Sci U S A.* **94**, 7748–7755 (1997).
- 1134 14. S. Kroken, J. W. Taylor, Phylogenetic species, Reproductive mode, and  
1135 specificity of the green alga *Trebouxia* forming lichens with the fungal genus  
1136 *Letharia*. *Bryologist.* **103**, 645–660 (2000).
- 1137 15. J. W. Taylor, D. J. Jacobson, S. Kroken, T. Kasuga, D. M. Geiser, D. S.  
1138 Hibbett, M. C. Fisher, Phylogenetic species recognition and species concepts in  
1139 fungi. *Fungal Genetics and Biology.* **31**, 21–32 (2000).
- 1140 16. M. A. Riley, M. Lizotte-Waniewski, "Population Genomics and the Bacterial  
1141 Species Concept" in (2009; [http://link.springer.com/10.1007/978-1-60327-853-](http://link.springer.com/10.1007/978-1-60327-853-9_21)  
1142 [9\\_21](http://link.springer.com/10.1007/978-1-60327-853-9_21)), pp. 367–377.
- 1143 17. A. Caro-Quintero, K. T. Konstantinidis, Bacterial species may exist,  
1144 metagenomics reveal. *Environ Microbiol.* **14** (2012), pp. 347–355.
- 1145 18. L.-M. Bobay, "The Prokaryotic Species Concept and Challenges" in *The*  
1146 *Pangenome: Diversity, Dynamics and Evolution of Genomes*, H. Tettelin, D.  
1147 Medini, Eds. (Springer International Publishing, Cham, 2020;  
1148 [https://doi.org/10.1007/978-3-030-38281-0\\_2](https://doi.org/10.1007/978-3-030-38281-0_2)), pp. 21–49.
- 1149 19. J. T. Staley, "The bacterial species dilemma and the genomic-phylogenetic  
1150 species concept" in *Philosophical Transactions of the Royal Society B:*  
1151 *Biological Sciences* (Royal Society, 2006), vol. 361, pp. 1899–1909.
- 1152 20. K. Cheeseman, J. Ropars, P. Renault, J. Dupont, J. Gouzy, A. Branca, A.-L.  
1153 Abraham, M. Ceppi, E. Conseiller, R. Debuchy, F. Malagnac, A. Goarin, P.  
1154 Silar, S. Lacoste, E. Sallet, A. Bensimon, T. Giraud, Y. Brygoo, Multiple  
1155 recent horizontal transfers of a large genomic region in cheese making fungi.  
1156 *Nat Commun.* **5** (2014), doi:10.1038/ncomms3876.
- 1157 21. S. J. Gould, E. A. Lloyd, "Individuality and adaptation across levels of  
1158 selection: How shall we name and generalize the unit of Darwinism?" (1999),  
1159 (available at [www.pnas.org](http://www.pnas.org)).
- 1160 22. W. J. Boecklen, Topology of syngameons. *Ecol Evol.* **7**, 10486–10491 (2017).
- 1161 23. C. H. Cannon, R. J. Petit, The oak syngameon: more than the sum of its parts.  
1162 *New Phytologist.* **226**, 978–983 (2020).
- 1163 24. M. Crisp, G. Chandler, Paraphyletic species. *Telopea (Syd).* **6**, 813–844 (1996).
- 1164 25. M. Noirot, A. Charrier, P. Stoffelen, F. Anthony, Reproductive isolation, gene  
1165 flow and speciation in the former *Coffea* subgenus: a review. *Trees - Structure*  
1166 *and Function.* **30**, 597–608 (2016).
- 1167 26. J. Ottenburghs, H.-J. Megens, R. H. S. Kraus, P. van Hooft, S. E. Wieren, R. P.  
1168 M. A. Crooijmans, R. C. Ydenberg, M. A. M. Groenen, H. H. T. Prins, The  
1169 genomic mosaicism of hybrid speciation. *Sci Adv.* **3**, e1602996 (2017).
- 1170 27. B. A. Curtis, G. Tanifuji, F. Burki, A. Gruber, M. Irimia, S. Maruyama, M. C.  
1171 Arias, S. G. Ball, G. H. Gile, Y. Hirakawa, J. F. Hopkins, A. Kuo, S. A.  
1172 Rensing, J. Schmutz, A. Symeonidi, M. Elias, R. J. M. Eveleigh, E. K. Herman,  
1173 M. J. Klute, T. Nakayama, M. Oborník, A. Reyes-Prieto, E. V. Armbrust, S. J.  
1174 Aves, R. G. Beiko, P. Coutinho, J. B. Dacks, D. G. Durnford, N. M. Fast, B. R.  
1175 Green, C. J. Grisdale, F. Hempel, B. Henrissat, M. P. Höppner, K.-I. Ishida, E.  
1176 Kim, L. Kořený, P. G. Kroth, Y. Liu, S.-B. Malik, U. G. Maier, D. McRose, T.  
1177 Mock, J. A. D. Neilson, N. T. Onodera, A. M. Poole, E. J. Pritham, T. A.  
1178 Richards, G. Rocap, S. W. Roy, C. Sarai, S. Schaack, S. Shirato, C. H.  
1179 Slamovits, D. F. Spencer, S. Suzuki, A. Z. Worden, S. Zauner, K. Barry, C.

- 1180 Bell, A. K. Bharti, J. A. Crow, J. Grimwood, R. Kramer, E. Lindquist, S.  
1181 Lucas, A. Salamov, G. I. McFadden, C. E. Lane, P. J. Keeling, M. W. Gray, I.  
1182 v Grigoriev, J. M. Archibald, Algal genomes reveal evolutionary mosaicism  
1183 and the fate of nucleomorphs. *Nature*. **492**, 59–65 (2012).
- 1184 28. A. Y. Ye, Y. Dou, X. Yang, S. Wang, A. Y. Huang, L. Wei, A model for  
1185 postzygotic mosaicisms quantifies the allele fraction drift, mutation rate, and  
1186 contribution to de novo mutations. *Genome Res.* **28**, 943–951 (2018).
- 1187 29. M. Ravinet, R. Faria, R. K. Butlin, J. Galindo, N. Bierne, M. Rafajlović, M. A.  
1188 F. Noor, B. Mehlig, A. M. Westram, Interpreting the genomic landscape of  
1189 speciation: a road map for finding barriers to gene flow. *J Evol Biol.* **30** (2017),  
1190 pp. 1450–1477.
- 1191 30. A. Tigano, V. L. Friesen, Genomics of local adaptation with gene flow. *Mol*  
1192 *Ecol.* **25** (2016), pp. 2144–2164.
- 1193 31. B. C. Carstens, T. A. Pelletier, N. M. Reid, J. D. Satler, How to fail at species  
1194 delimitation. *Mol Ecol.* **22**, 4369–4383 (2013).
- 1195 32. T. Dobzhansky, *Genetics and the Origin of Species* (Columbia Univ. Press,  
1196 New York, 1937).
- 1197 33. C. Gueidan, C. Roux, F. Lutzoni, Using a multigene phylogenetic analysis to  
1198 assess generic delineation and character evolution in Verrucariaceae  
1199 (Verrucariales, Ascomycota). *Mycol Res.* **111**, 1145–68 (2007).
- 1200 34. U. Arup, U. Søchting, P. Frödén, A new taxonomy of the family  
1201 Teloschistaceae. *Nord J Bot.* **31**, 016–083 (2013).
- 1202 35. M. Wedin, H. Doring, J. Mattsson, H. D. A. J.-E. M. Mats Wedin, T. Natural,  
1203 H. Museum, C. Rd, L. Sw, A multi-gene study of the phylogenetic  
1204 relationships of the Parmeliaceae. *Mycol Res.* **103**, 1185–1192 (1999).
- 1205 36. A. Crespo, F. Kauff, P. K. Divakar, R. Prado, S. Pérez-ortega, G. A. De Paz, Z.  
1206 Ferencova, O. Blanco, B. Roca-valiente, J. Núñez-zapata, P. Cubas, A.  
1207 Argüello, J. A. Elix, T. L. Esslinger, D. L. Hawksworth, A. Millanes, M. C.  
1208 Molina, M. Wedin, T. Ahti, A. Aptroot, E. M. Barreno, F. Bungartz, S.  
1209 Calvelo, M. Candan, M. Cole, D. Ertz, B. Goffinet, Phylogenetic generic  
1210 classification of parmelioid lichens ( Parmeliaceae , Ascomycota ) based on  
1211 molecular , morphological and chemical evidence. *Taxon.* **59**, 1735–1753  
1212 (2010).
- 1213 37. R. Lücking, B. P. Hodkinson, S. D. Leavitt, The 2016 classification of  
1214 lichenized fungi in the Ascomycota and Basidiomycota – Approaching one  
1215 thousand genera. *Bryologist.* **119**, 361–416 (2016).
- 1216 38. L. B. Beheregaray, A. Caccone, Cryptic biodiversity in a changing world. *J*  
1217 *Biol.* **6** (2007), doi:10.1186/jbiol60.
- 1218 39. A. Crespo, H. T. Lumbsch, cryptic species in lichen-forming fungi. *IMA*  
1219 *Fungus.* **1**, 167–170 (2010).
- 1220 40. C. G. Boluda, D. L. Hawksworth, P. K. Divakar, A. Crespo, V. J. Rico,  
1221 Microchemical and molecular investigations reveal Pseudephebe species as  
1222 cryptic with an environmentally modified morphology. *The Lichenologist.* **48**,  
1223 527–543 (2016).
- 1224 41. A. Crespo, S. Pérez-Ortega, Cryptic species and species pairs in lichens: A  
1225 discussion on the relationship between molecular phylogenies and  
1226 morphological characters. *Anales del Jardín Botánico de Madrid.* **66**, 71–81  
1227 (2010).
- 1228 42. T. Spribille, B. Klug, H. Mayrhofer, A phylogenetic analysis of the boreal  
1229 lichen *Mycoblastus sanguinarius* (Mycoblastaceae, lichenized Ascomycota)

- 1230 reveals cryptic clades correlated with fatty acid profiles. *Mol Phylogenet Evol.*  
1231 **59**, 603–14 (2011).
- 1232 43. G. Singh, F. D. Grande, P. K. Divakar, J. Otte, Coalescent-based species  
1233 delimitation approach uncovers high cryptic diversity in the cosmopolitan  
1234 lichen-forming fungal genus *Protoparmelia* (Lecanorales, Ascomycota), 1–20  
1235 (2015).
- 1236 44. U. Arup, U. Søchting, J. Vondrák, P. R. The taxonomy of the *Caloplaca citrina*  
1237 group ( Teloschistaceae ) in the Black Sea region ; with contributions to the  
1238 cryptic species concept in lichenology. *The Lichenologist.* **41**, 571–604 (2009).
- 1239 45. S. Altermann, S. D. Leavitt, T. Goward, M. P. Nelsen, H. T. Lumbsch, How  
1240 Do You Solve a Problem like *Letharia*? A New Look at Cryptic Species in  
1241 Lichen-Forming Fungi Using Bayesian Clustering and SNPs from Multilocus  
1242 Sequence Data. *PLoS One.* **9**, e97556 (2014).
- 1243 46. S. D. Leavitt, J. D. Fankhauser, D. H. Leavitt, L. D. Porter, L. A. Johnson, L.  
1244 L. St Clair, Complex patterns of speciation in cosmopolitan “rock posy”  
1245 lichens - discov- ering and delimiting cryptic fungal species in the lichen-  
1246 forming *Rhizoplaca melanophthalma* species-complex (Lecanoraceae,  
1247 Ascomycota). *Mol Phylogenet Evol.* **59**, 587–602 (2011).
- 1248 47. D. Bickford, D. J. Lohman, N. S. Sodhi, P. K. L. Ng, R. Meier, K. Winker, K.  
1249 K. Ingram, I. Das, Cryptic species as a window on diversity and conservation.  
1250 *Trends Ecol Evol.* **22**, 148–155 (2007).
- 1251 48. A. J. Shaw, Biogeographic patterns and cryptic speciation in bryophytes. *J*  
1252 *Biogeogr.* **28**, 253–261 (2001).
- 1253 49. P. Trontelj, C. Fišer, Cryptic species diversity should not be trivialised. *Syst*  
1254 *Biodivers.* **7**, 1 (2008).
- 1255 50. C. Fiser, C. T. Robinson, F. Malard, Cryptic species as a window into the  
1256 paradigm shift of the species concept. *Mol Ecol.* **12**, 3218–3221 (2017).
- 1257 51. J. Bernardo, A critical appraisal of the meaning and diagnosability of cryptic  
1258 evolutionary diversity, and its implications for conservation in the face of  
1259 climate change. *Climate Change, Ecology and Systematics*, 380–438 (2011).
- 1260 52. H. T. Lumbsch, S. D. Leavitt, Goodbye morphology? A paradigm shift in the  
1261 delimitation of species in lichenized fungi. *Fungal Divers.* **50**, 59–72 (2011).
- 1262 53. Martin Ryberg, Molecular operational taxonomic units as approximations of  
1263 species in the light of evolutionary models and empirical data from Fungi. *Mol*  
1264 *Ecol.* **24**, 5770–5777 (2015).
- 1265 54. L. S. Kubatko, J. H. Degnan, Inconsistency of phylogenetic estimates from  
1266 concatenated data under coalescence. *Syst Biol.* **56**, 17–24 (2007).
- 1267 55. T. Fujisawa, T. G. Barraclough, Delimiting species using single-locus data and  
1268 the Generalized Mixed Yule Coalescent approach: a revised method and  
1269 evaluation on simulated data sets. *Syst Biol.* **62**, 707–24 (2013).
- 1270 56. N. PUILLANDRE, A. LAMBERT, S. BROUILLET, G. ACHAZ, ABGD,  
1271 Automatic Barcode Gap Discovery for primary species delimitation. *Mol Ecol.*  
1272 **21**, 1864–1877 (2012).
- 1273 57. C. Zhang, M. Rabiee, E. Sayyari, S. Mirarab, ASTRAL-III: Polynomial time  
1274 species tree reconstruction from partially resolved gene trees. *BMC*  
1275 *Bioinformatics.* **19** (2018), doi:10.1186/s12859-018-2129-y.
- 1276 58. B. R. Larget, S. K. Kotha, C. N. Dewey, C. Ané, BUCKy: Gene Tree  
1277 Reconciliation with Concordance: Supplementary information, 1–4 (2010).

- 1278 59. E. Jacox, C. Chauve, G. J. Szöllösi, Y. Ponty, C. Scornavacca, EcceTERA:  
1279 Comprehensive gene tree-species tree reconciliation using parsimony.  
1280 *Bioinformatics*. **32**, 2056–2058 (2016).
- 1281 60. E. Mossel, S. Roch, Incomplete lineage sorting: consistent phylogeny  
1282 estimation from multiple loci. *IEEE/ACM transactions on computational*  
1283 *biology and bioinformatics / IEEE, ACM*. **7**, 166–71 (2010).
- 1284 61. W. P. Maddison, L. L. Knowles, Inferring phylogeny despite incomplete  
1285 lineage sorting. *Syst Biol*. **55**, 21–30 (2006).
- 1286 62. Y. Zhang, J. Clancy, J. Jensen, R. T. McMullin, L. Wang, S. D. Leavitt,  
1287 Providing Scale to a Known Taxonomic Unknown—At Least a 70-Fold  
1288 Increase in Species Diversity in a Cosmopolitan Nominal Taxon of Lichen-  
1289 Forming Fungi. *Journal of Fungi*. **8** (2022), doi:10.3390/jof8050490.
- 1290 63. R. Lücking, M. C. Aime, B. Robbertse, A. N. Miller, H. A. Ariyawansa, T.  
1291 Aoki, G. Cardinali, P. W. Crous, I. S. Druzhinina, D. M. Geiser, D. L.  
1292 Hawksworth, K. D. Hyde, L. Irinyi, R. Jeewon, P. R. Johnston, P. M. Kirk, E.  
1293 Malosso, T. W. May, W. Meyer, M. Öpik, V. Robert, M. Stadler, M. Thines,  
1294 D. Vu, A. M. Yurkov, N. Zhang, C. L. Schoch, Unambiguous identification of  
1295 fungi: Where do we stand and how accurate and precise is fungal DNA  
1296 barcoding? *IMA Fungus*. **11** (2020), doi:10.1186/s43008-020-00033-z.
- 1297 64. L. L. Knowles, L. S. Kubatko, *Estimating species trees: practical and*  
1298 *theoretical aspects* (Wiley-Blackwell, Hoboken, 2010).
- 1299 65. Y. Tian, L. S. Kubatko, Expected pairwise congruence among gene trees under  
1300 the coalescent model. *Mol Phylogenet Evol*. **106**, 144–150 (2017).
- 1301 66. L. Kubatko, Species tree estimation (2015).
- 1302 67. L. Kubatko, Species Tree Inference. *Evolution (N Y)*, 1–33 (2012).
- 1303 68. A. D. Leaché, B. Rannala, The accuracy of species tree estimation under  
1304 simulation: a comparison of methods. *Syst Biol*. **60**, 126–37 (2011).
- 1305 69. Z. Yang, B. Rannala, Unguided species delimitation using DNA sequence data  
1306 from multiple loci (2014), doi:10.1093/molbev/msu279.
- 1307 70. B. Rannala, Z. Yang, Improved reversible jump algorithms for Bayesian  
1308 species delimitation. *Genetics*. **194**, 245–253 (2013).
- 1309 71. Z. Yang, B. Rannala, Bayesian species delimitation using multilocus sequence  
1310 data. *Proc Natl Acad Sci U S A*. **107**, 9264–9 (2010).
- 1311 72. H. C. Lanier, L. L. Knowles, Is Recombination a Problem for Species-Tree  
1312 Analyses? *Syst Biol*. **61**, 691–701 (2012).
- 1313 73. C. Solís-Lemus, M. Yang, C. Ané, Inconsistency of species-tree methods under  
1314 gene flow. *Syst Biol*, syw030 (2016).
- 1315 74. S. Joly, P. a McLenachan, P. J. Lockhart, A statistical approach for  
1316 distinguishing hybridization and incomplete lineage sorting. *Am Nat*. **174**, E54-  
1317 70 (2009).
- 1318 75. J. Hey, Introduction to the IM and IMA computer programs Understanding  
1319 Markov chain Monte Carlo ( MCMC ) 6 How Long to Run the Program  
1320 Metropolis Coupling of Markov chains Assessing the Autocorrelation of  
1321 Recorded Values Parameter Conversions Cautions , Suggestio. *Mol Biol Evol*,  
1322 1–16 (2007).
- 1323 76. A. Sethuraman, J. Hey, *Mol Ecol Resour*, in press, doi:10.1111/1755-  
1324 0998.12437.
- 1325 77. J. M. Cornuet, P. Pudlo, J. Veyssier, a Estoup, DIYABC version 2.0 A user-  
1326 friendly software for inferring population history through Approximate



- 1327 Bayesian Computations using microsatellite, DNA sequence and SNP data, 91  
1328 (2013).
- 1329 78. B. S. Meyer, M. Matschiner, W. Salzburger, Disentangling incomplete lineage  
1330 sorting and introgression to refine species-tree estimates for Lake Tanganyika  
1331 cichlid fishes. *bioRxiv*, 1–62 (2016).
- 1332 79. Y. Chung, C. Ané, Comparing two bayesian methods for gene tree/species tree  
1333 reconstruction: Simulations with incomplete lineage sorting and horizontal  
1334 gene transfer. *Syst Biol.* **60**, 261–275 (2011).
- 1335 80. Y. Qu, R. Zhang, Q. Quan, G. Song, S. H. Li, F. Lei, Incomplete lineage  
1336 sorting or secondary admixture: disentangling historical divergence from recent  
1337 gene flow in the Vinous-throated parrotbill (*Paradoxornis webbianus*). *Mol*  
1338 *Ecol.* **21**, 6117–33 (2012).
- 1339 81. O. Meleshko, M. D. Martin, T. S. Korneliussen, C. Schröck, P. Lamkowski, J.  
1340 Schmutz, A. Healey, B. T. Piatkowski, A. J. Shaw, D. J. Weston, K. I. Flatberg,  
1341 P. Szövényi, K. Hassel, H. K. Stenøien, Extensive Genome-Wide Phylogenetic  
1342 Discordance Is Due to Incomplete Lineage Sorting and Not Ongoing  
1343 Introgression in a Rapidly Radiated Bryophyte Genus. *Mol Biol Evol.* **38**,  
1344 2750–2766 (2021).
- 1345 82. L. Choleva, Z. Musilova, A. Kohoutova-Sediva, J. Paces, P. Rab, K. Janko,  
1346 Distinguishing between incomplete lineage sorting and genomic introgressions:  
1347 Complete fixation of allospecific mitochondrial DNA in a sexually reproducing  
1348 fish (*Cobitis*; Teleostei), despite clonal reproduction of hybrids. *PLoS One.* **9**  
1349 (2014), doi:10.1371/journal.pone.0080641.
- 1350 83. J. L. Strasburg, L. H. Rieseberg, How robust are “isolation with migration”  
1351 analyses to violations of the im model? A simulation study. *Mol Biol Evol.* **27**,  
1352 297–310 (2010).
- 1353 84. J. W. Taylor, D. M. Geiser, † Austin Burt, V. Koufopanou, “The Evolutionary  
1354 Biology and Population Genetics Underlying Fungal Strain Typing” (1999).
- 1355 85. E. L. Larson, T. A. White, C. L. Ross, R. G. Harrison, Gene flow and the  
1356 maintenance of species boundaries. *Mol Ecol.* **23**, 1668–1678 (2014).
- 1357 86. R. Keuler, J. Jensen, A. Barcena-Peña, F. Grewe, H. Thorsten Lumbsch, J. P.  
1358 Huang, S. D. Leavitt, Interpreting phylogenetic conflict: Hybridization in the  
1359 most speciose genus of lichen-forming fungi. *Mol Phylogenet Evol.* **174**  
1360 (2022), doi:10.1016/j.ympev.2022.107543.
- 1361 87. R. Keuler, A. Garretson, T. Saunders, R. J. Erickson, N. st. Andre, F. Grewe,  
1362 H. Smith, H. T. Lumbsch, J. P. Huang, L. L. st. Clair, S. D. Leavitt, Genome-  
1363 scale data reveal the role of hybridization in lichen-forming fungi. *Sci Rep.* **10**  
1364 (2020), doi:10.1038/s41598-020-58279-x.
- 1365 88. J. Jorna, J. B. Linde, P. C. Searle, A. C. Jackson, M.-E. Nielsen, M. S. Nate, N.  
1366 A. Saxton, F. Grewe, M. de los A. Herrera-Campos, R. W. Spjut4, H. Wu, B.  
1367 Ho, H. T. Lumbsch, S. D. Leavitt, Species boundaries in the messy middle –  
1368 testing the hypothesis of micro-endemism in a recently diverged lineage of  
1369 coastal fog desert lichen fungi *Journal: Ecol Evol.* **38**, 253–262 (2020).
- 1370 89. T. Gabaldón, Hybridization and the origin of new yeast lineages. *FEMS Yeast*  
1371 *Res.* **20**, 1–8 (2020).
- 1372 90. J. Steensels, B. Gallone, K. J. Verstrepen, Interspecific hybridization as a  
1373 driver of fungal evolution and adaptation. *Nat Rev Microbiol.* **0123456789**  
1374 (2021), doi:10.1038/s41579-021-00537-4.
- 1375 91. E. H. Stukenbrock, The role of hybridization in the evolution and emergence of  
1376 new fungal plant pathogens. *Phytopathology.* **106**, 104–112 (2016).

- 1377 92. J. Komluski, E. H. Stukenbrock, M. Habig, Non-Mendelian transmission of  
1378 accessory chromosomes in fungi. *Chromosome Research*. **30** (2022), pp. 241–  
1379 253.
- 1380 93. N. C. Mishra, E. L. Tatum, “Non-Mendelian Inheritance of DNA-Induced  
1381 Inositol Independence in *Neurospora*  
1382 (exosome/integration/meiosis/transformation)” (1973), (available at  
1383 <https://www.pnas.org>).
- 1384 94. A. Lorenz, S. J. Mpaulo, Gene conversion: a non-Mendelian process integral to  
1385 meiotic recombination. *Heredity (Edinb)*. **129**, 56–63 (2022).
- 1386 95. J. Vondrák, J. Šoun, O. Vondráková, A. M. Fryday, A. Khodosovtsev, E. a.  
1387 Davydov, Absence of anthraquinone pigments is paraphyletic and a  
1388 phylogenetically unreliable character in the Teloschistaceae. *The Lichenologist*.  
1389 **44**, 401–418 (2012).
- 1390 96. H. Wunder, Schwarzfrüchtige, saxicole Sippen der Gattung *Caloplaca*  
1391 (Lichenes, Teloschistaceae) in Mitteleuropa, dem Mittelmeergebiet und  
1392 Vorderasien. *Bibliotheca Lichenologica*. **3**, 1–186 (1974).
- 1393 97. C. M. Wetmore, The Lichen Genus *Caloplaca* in North and Central America  
1394 with Brown or Black Apothecia Author ( s ): Clifford M . Wetmore Stable  
1395 URL : <http://www.jstor.org/stable/3760596> REFERENCES Linked references  
1396 are available on JSTOR for this article : You may need t. *Mycologia*. **86**, 813–  
1397 838 (1994).
- 1398 98. G. Clauzade, C. Roux, J.-M. Houmeau, C. Roux, *Likenoj de Okcidenta*  
1399 *Eŭropo: ilustrita determinlibro* (Société botanique du centre-ouest, 1985).
- 1400 99. L. Muggia, M. Grube, M. Tretiach, A combined molecular and morphological  
1401 approach to species delimitation in black-fruited, endolithic *Caloplaca*: high  
1402 genetic and low morphological diversity. *Mycol Res*. **112**, 36–49 (2008).
- 1403 100. G. L. Zhou, Z. T. Zhao, L. Lü, D. B. Tong, M. M. Ma, H. Y. Wang, Seven dark  
1404 fruiting lichens of *Caloplaca* from China. *Mycotaxon*. **122**, 307–324 (2012).
- 1405 101. M. Tretiach, L. Muggia, *Caloplaca badioreagens*, a new calcicolous, endolithic  
1406 lichen from Italy. *Lichenologist*. **38**, 223–229 (2006).
- 1407 102. A. Khodosovtsev, S. Kondratyuk, I. Kärnefelt, *Caloplaca albopustulata*, a new  
1408 saxicolous lichen from Crimea Peninsula, Ukraine. *Graph Scr*. **13**, 5–8 (2002).
- 1409 103. J. Vondrák, A. Khodosovtsev, P. Říha, *Caloplaca concreticola*  
1410 (Teloschistaceae), a new species from anthropogenic substrata in Eastern  
1411 Europe. *The Lichenologist*. **40**, 97–104 (2008).
- 1412 104. H. Xahidin, A. Abbas, J.-C. Wei, *Caloplaca tianshanensis* (lichen-forming  
1413 Ascomycota), a new species of subgenus *Pyrenodesmia* from China.  
1414 *Mycotaxon*. **114**, 1–6 (2010).
- 1415 105. I. Frolov, J. Vondrák, "Black-fruited *Caloplaca* (Teloschistales, Ascomycota)  
1416 in the steppe zone of the Southern Ural Mts and surrounding areas" in *Cmenu*  
1417 *Северной Евразии: материалы VI Международного симпозиума* (2012),  
1418 pp. 770–773.
- 1419 106. I. Frolov, J. Vondrák, F. Fernández-Mendoza, K. Wilk, A. Khodosovtsev, M.  
1420 G. Halıcı, M. G. Halıcı, Three new, seemingly-cryptic species in the lichen  
1421 genus *Caloplaca* (Teloschistaceae) distinguished in two-phase phenotype  
1422 evaluation. *Ann Bot Fenn*. **53**, 243–262 (2016).
- 1423 107. J. H. Degnan, N. a Rosenberg, Gene tree discordance, phylogenetic inference  
1424 and the multispecies coalescent. *Trends Ecol Evol*. **24**, 332–40 (2009).
- 1425 108. G. R. Jones, STACEY: species delimitation and phylogeny estimation under  
1426 the multispecies coalescent. *bioRxiv*, 010199 (2014).

- 1427 109. G. Jones, Z. Aydin, B. Oxelman, DISSECT: an assignment-free Bayesian  
1428 discovery method for species delimitation under the multispecies coalescent.  
1429 *Bioinformatics*. **31**, 991–998 (2015).
- 1430 110. Z. Yang, The BPP program for species tree estimation and species delimitation.  
1431 *Curr Zool*. **61**, 854–865 (2015).
- 1432 111. C. Zhang, M. Rabiee, E. Sayyari, S. Mirarab, ASTRAL-III: Polynomial time  
1433 species tree reconstruction from partially resolved gene trees. *BMC*  
1434 *Bioinformatics*. **19** (2018), doi:10.1186/s12859-018-2129-y.
- 1435 112. F. Fernandez-Mendoza, F. Fernández Mendoza, F. Fernández-Mendoza, thesis,  
1436 Johann-Wolfgang-Goethe-Universität Frankfurt am Main, Frankfurt am Main  
1437 (2013).
- 1438 113. U. Ruprecht, F. Fernández-Mendoza, R. Türk, A. M. Fryday, High levels of  
1439 endemism and local differentiation in the fungal and algal symbionts of  
1440 saxicolous lecideoid lichens along a latitudinal gradient in southern South  
1441 America. *bioRxiv*. **52**, 699942 (2020).
- 1442 114. T. Lutsak, F. Fernández-Mendoza, P. Kirika, M. Wondafrash, C. Printzen,  
1443 Coalescence-based species delimitation using genome-wide data reveals hidden  
1444 diversity in a cosmopolitan group of lichens. *Org Divers Evol*. **20**, 219–220  
1445 (2020).
- 1446 115. I. Garrido-Benavent, S. Pérez-Ortega, A. de Los Rios, H. Mayrhofer, F.  
1447 Fernández-Mendoza, Neogene speciation and Pleistocene expansion of the  
1448 genus *Pseudephebe* (Parmeliaceae, lichenized fungi) involving multiple  
1449 colonizations of Antarctica. *Mol Phylogenet Evol*. **155**, 107020 (2021).
- 1450 116. S. Leavitt, F. Fernández-Mendoza, S. Pérez-Ortega, M. Sohrabi, P. Divakar, T.  
1451 Lumbsch, L. S. Clair, DNA barcode identification of lichen-forming fungal  
1452 species in the *Rhizoplaca melanophthalma* species-complex (Lecanorales,  
1453 Lecanoraceae), including five new species. *MycKeys*. **7**, 1 (2013).
- 1454 117. R. Ortiz-Álvarez, A. de Los Ríos, F. Fernández-Mendoza, A. Torralba-Burrial,  
1455 S. Pérez-Ortega, Ecological Specialization of Two Photobiont-Specific  
1456 Maritime Cyanolichen Species of the Genus *Lichina*. *PLoS One*. **10**, e0132718  
1457 (2015).
- 1458 118. I. Garrido-Benavent, S. Pérez-Ortega, A. de los Ríos, From Alaska to  
1459 Antarctica: Species boundaries and genetic diversity of *Prasiola*  
1460 (*Trebouxiophyceae*), a foliose chlorophyte associated with the bipolar lichen-  
1461 forming fungus *Mastodia tessellata*. *Mol Phylogenet Evol*. **107**, 117–131  
1462 (2017).
- 1463 119. F. Fernández-Mendoza, C. Printzen, Pleistocene expansion of the bipolar  
1464 lichen *C. etraria aculeata* into the Southern hemisphere. *Mol Ecol*. **22**, 1961–  
1465 1983 (2013).
- 1466 120. T. M. W. Nye, P. Liò, W. R. Gilks, A novel algorithm and web-based tool for  
1467 comparing two alternative phylogenetic trees. *Bioinformatics*. **22**, 117–119  
1468 (2006).
- 1469 121. D. Huson, S. Linz, Autumn Algorithm – Computation of Hybridization  
1470 Networks for Realistic Phylogenetic Trees. *IEEE/ACM Trans Comput Biol*  
1471 *Bioinform*. **5963**, 1–1 (2016).
- 1472 122. T. Mailund, A. E. Halager, M. Westergaard, J. Y. Dutheil, K. Munch, A.  
1473 Scally, A. Hobolth, M. H. Schierup, L. N. Andersen, G. Lunter, K. Pru, A New  
1474 Isolation with Migration Model along Complete Genomes Infers Very  
1475 Different Divergence Processes among Closely Related Great Ape Species. **8**  
1476 (2012), doi:10.1371/journal.pgen.1003125.

- 1477 123. J.-M. Cornuet, F. Santos, M. a. Beaumont, C. P. Robert, J.-M. Marin, D. J.  
1478 Balding, T. Guillemaud, a. Estoup, Inferring population history with DIY  
1479 ABC: a user-friendly approach to approximate Bayesian computation.  
1480 *Bioinformatics*. **24**, 2713–2719 (2008).
- 1481 124. J. Corander, P. Waldmann, P. Marttinen, M. J. Sillanpää, BAPS 2: enhanced  
1482 possibilities for the analysis of genetic population structure. *Bioinformatics*. **20**,  
1483 2363–2369 (2004).
- 1484 125. J. Corander, P. Marttinen, J. Tang, J. Sirén, Enhanced Bayesian modelling in  
1485 BAPS software for learning genetic structures of populations. *BMC*  
1486 *Bioinformatics*. **9**, 539 (2008).
- 1487 126. B. C. Carstens, P. Joyce, J. Sullivan, a. Bankhead, Testing population genetic  
1488 structure using parametric bootstrapping and MIGRATE-N. *Genetica*. **124**, 71–  
1489 75 (2005).
- 1490 127. J. Heitman, J. W. Kronstad, J. W. Taylor, L. A. Casselton, others, *Sex in fungi:*  
1491 *molecular determination and evolutionary implications*. (ASM Press, 2007).
- 1492 128. J. A. Balbuena, Ó. A. Pérez-Escobar, C. Llopis-Belenguer, I. Blasco-Costa,  
1493 Random tanglegram partitions (random tapas): An alexandrian approach to the  
1494 cophylogenetic gordian knot. *Syst Biol*. **69**, 1212–1230 (2020).
- 1495 129. J. A. Balbuena, R. Míguez-Lozano, I. Blasco-Costa, PACo: A Novel Procrustes  
1496 Application to Cophylogenetic Analysis. *PLoS One*. **8** (2013),  
1497 doi:10.1371/journal.pone.0061048.
- 1498 130. F. E. Hartmann, M. Duhamel, F. Carpentier, M. E. Hood, M. Foulongne-Oriol,  
1499 P. Silar, F. Malagnac, P. Grognet, T. Giraud, Recombination suppression and  
1500 evolutionary strata around mating-type loci in fungi: documenting patterns and  
1501 understanding evolutionary and mechanistic causes. *New Phytologist*. **229**  
1502 (2021), pp. 2470–2491.
- 1503 131. C. Dormann, B. Gruber, J. Fründ, *Interaction*, in press.
- 1504 132. G. Csardi, T. Nepusz, The igraph software package for complex network  
1505 research. *InterJournal*. **Complex Sy**, 1695 (2006).
- 1506 133. L. Fu, B. Niu, Z. Zhu, S. Wu, W. Li, CD-HIT: Accelerated for clustering the  
1507 next-generation sequencing data. *Bioinformatics*. **28**, 3150–3152 (2012).
- 1508 134. V. D. Blondel, J.-L. Guillaume, R. Lambiotte, E. Lefebvre, Fast unfolding of  
1509 communities in large networks. *Journal of Statistical Mechanics: Theory and*  
1510 *Experiment*. **2008**, P10008 (2008).
- 1511 135. V. Policastro, D. Righelli, A. Carissimo, L. Cutillo, I. de Feis, “ROBustness In  
1512 Network (robin): an R Package for Comparison and Validation of  
1513 Communities,” (available at <https://github.com/polcolomer/>).
- 1514 136. Pol Colomer, RandNetGen (2022), (available at  
1515 <https://github.com/polcolomer/RandNetGen>).
- 1516 137. S. L. Ament-Velásquez, V. Tuovinen, L. Bergström, T. Spribille, D.  
1517 Vanderpool, J. Nascimbene, Y. Yamamoto, G. Thor, H. Johannesson, The Plot  
1518 Thickens: Haploid and Triploid-Like Thalli, Hybridization, and Biased Mating  
1519 Type Ratios in Letharia. *Frontiers in Fungal Biology*. **2** (2021),  
1520 doi:10.3389/ffunb.2021.656386.
- 1521 138. M. D’Angiolo, M. de Chiara, J. X. Yue, A. Irizar, S. Stenberg, K. Persson, A.  
1522 Llored, B. Barré, J. Schacherer, R. Marangoni, E. Gilson, J. Warringer, G. Liti,  
1523 A yeast living ancestor reveals the origin of genomic introgressions. *Nature*.  
1524 **587**, 420–425 (2020).
- 1525 139. A. C. Testa, R. P. Oliver, J. K. Hane, OcculterCut: A comprehensive survey of  
1526 at-rich regions in fungal genomes. *Genome Biol Evol*. **8**, 2044–2064 (2016).

- 1527 140. Y. Sun, J. Svedberg, M. Hiltunen, P. Corcoran, H. Johannesson, Large-scale  
1528 suppression of recombination predates genomic rearrangements in *Neurospora*  
1529 *tetrasperma*. *Nat Commun.* **8** (2017), doi:10.1038/s41467-017-01317-6.
- 1530 141. P. B. Talbert, S. Henikoff, Centromeres convert but don't cross. *PLoS Biol.* **8**  
1531 (2010), doi:10.1371/journal.pbio.1000326.
- 1532 142. A. K. Okita, F. Zafar, J. Su, D. Weerasekara, T. Kajitani, T. S. Takahashi, H.  
1533 Kimura, Y. Murakami, H. Masukata, T. Nakagawa, Heterochromatin  
1534 suppresses gross chromosomal rearrangements at centromeres by repressing  
1535 Tfs1/TFIIS-dependent transcription. *Commun Biol.* **2** (2019),  
1536 doi:10.1038/s42003-018-0251-z.
- 1537 143. F. Zafar, A. K. Okita, A. T. Onaka, J. Su, Y. Katahira, J. I. Nakayama, T. S.  
1538 Takahashi, H. Masukata, T. Nakagawa, Regulation of mitotic recombination  
1539 between DNA repeats in centromeres. *Nucleic Acids Res.* **45**, 11222–11235  
1540 (2017).
- 1541 144. P. Talbert, S. Henikoff, Centromeres organize (epi)genome architecture. *Cell.*  
1542 **185**, 3083–3085 (2022).
- 1543 145. J. Macas, L. Á. Robledillo, J. Kreplak, P. Novák, A. Koblířková, I. Vrbová,  
1544 J. Burstin, P. Neumann, Assembly of the 81.6 Mb centromere of pea  
1545 chromosome 6 elucidates the structure and evolution of metapolycentric  
1546 chromosomes. *bioRxiv* (2022), doi:10.1101/2022.10.25.513671.
- 1547 146. P. G. Hofstatter, G. Thangavel, T. Lux, P. Neumann, T. Vondrak, P. Novak, M.  
1548 Zhang, L. Costa, M. Castellani, A. Scott, H. Toegelová, J. Fuchs, Y. Mata-  
1549 Sucre, Y. Dias, A. L. L. Vanzela, B. Huettel, C. C. S. Almeida, H. Šimková, G.  
1550 Souza, A. Pedrosa-Harand, J. Macas, K. F. X. Mayer, A. Houben, A. Marques,  
1551 Repeat-based holocentromeres influence genome architecture and karyotype  
1552 evolution. *Cell.* **185**, 3153-3168.e18 (2022).
- 1553 147. D. Gravel, B. Baiser, J. A. Dunne, J. P. Kopelke, N. D. Martinez, T. Nyman, T.  
1554 Poisot, D. B. Stouffer, J. M. Tylianakis, S. A. Wood, T. Roslin, Bringing Elton  
1555 and Grinnell together: a quantitative framework to represent the biogeography  
1556 of ecological interaction networks. *Ecography* (2018), pp. 1–15.
- 1557 148. J. Lehtonen, D. J. Schmidt, K. Heubel, H. Kokko, Evolutionary and ecological  
1558 implications of sexual parasitism. *Trends Ecol Evol.* **28**, 297–306 (2013).
- 1559 149. T. Madden, G. Coulouris, BLAST Command Line Applications User Manual  
1560 BLAST Command Line Applications User Manual - BLAST® ..., 1–28  
1561 (2008).
- 1562 150. A. J. Drummond, B. Ashton, S. Buxton, M. Cheung, A. Cooper, C. Duran, M.  
1563 Field, J. Heled, M. Kearse, S. Markowitz, R. Moir, S. Stones-Havas, S.  
1564 Sturrock, T. Thierer, A. Wilson, Geneious v5.3 (2010), (available at  
1565 <http://www.geneious.com>).
- 1566 151. S. Katoh, MAFFT multiple sequence alignment software version 7:  
1567 improvements in performance and usability. *Mol Biol Evol.* **30**, 772–780  
1568 (2013).
- 1569 152. M. Kearse, R. Moir, A. Wilson, S. Stones-Havas, M. Cheung, S. Sturrock, S.  
1570 Buxton, A. Cooper, S. Markovitz, C. Duran, T. Thierer, B. Ashton, P. Mentjies,  
1571 A. Drummond, Geneious Basic: an integrated and extendable desktop software  
1572 platform for the organization and analysis of sequence data. *Bioinformatics.* **28**,  
1573 1647–1649 (2012).
- 1574 153. U. Manual, D. H. Huson, User Manual for MEGAN V5.7.0, 1–62 (2014).
- 1575 154. D. Huson, S. Mitra, H. Ruscheweyh, Integrative analysis of environmental  
1576 sequences using MEGAN4. *Genome Res.* **21**, 1552–1560 (2011).

- 1577 155. M. Stephens, N. J. Smith, P. Donnelly, A New Statistical Method for  
1578 Haplotype Reconstruction from Population Data, 978–989 (2001).
- 1579 156. M. Stephens, P. Donnelly, A Comparison of Bayesian Methods for Haplotype  
1580 Reconstruction from Population Genotype Data, 1162–1169 (2003).
- 1581 157. R. C. Garrick, P. Sunnucks, R. J. Dyer, P. Brito, S. Edwards, V. Friesen, B.  
1582 Congdon, M. Kidd, T. Birt, S. Jarman, R. Ward, N. Elliot, B. Carstens, L.  
1583 Knowles, R. Garrick, D. Rowell, C. Simmons, D. Hillis, P. Sunnucks, G.  
1584 Dolman, C. Moritz, J. Avise, D.-X. Zhang, G. Hewitt, M. Stephens, N. Smith,  
1585 P. Donnelly, S. Lin, D. Cutler, M. Zwick, A. Chakravarti, T. Niu, Z. Qin, X.  
1586 Xu, J. Liu, R. Adkins, A. Sabbagh, P. Darlu, J. Marchini, N. Patterson, E.  
1587 Eskin, E. Halperin, H. Munro, G. Abecasis, B. Bettencourt, M. Santos, R.  
1588 Fialho, A. Couto, M. Peixoto, J. Pinheiro, H. Spínola, M. Mora, C. Santos, A.  
1589 Brehm, J. Bruges-Armas, C. Lamina, F. Bongardt, H. Küchenhoff, I. Heid, S.  
1590 Tishkoff, A. Pakstis, G. Ruano, K. Kidd, R. Broughton, R. Harrison, C. Muster,  
1591 W. Maddison, S. Uhlmann, T. Berendonk, A. Vogler, K. Ibrahim, S. Cooper,  
1592 Z.-S. Huang, Y.-J. Ji, R. Harrigan, M. Mazza, M. Sorenson, J. Barker, E. Sotka,  
1593 J. Wares, J. Barth, R. Grosberg, S. Palumbi, S. Edwards, S. Bensch, M.  
1594 Kuhner, J. Yamato, J. Felsenstein, P. Beerli, J. Hey, R. Nielsen, J. Degenhardt,  
1595 A. Stevenson, J. Sullivan, E. DeChaine, A. Martin, J. Nason, C. Meadows, R.  
1596 Dyer, G. Watterson, J. Cornuet, G. Luikart, Y.-X. Fu, A. Rogers, H.  
1597 Harpending, C. Sands, A. Wilson, L. Beheregaray, K. Zenger, J. French, A.  
1598 Taylor, D. Maddison, J. Rozas, J. Sánchez-DelBarrio, X. Messeguer, R. Rozas,  
1599 J.-F. Flot, D. P. Faith, K. Tamura, J. Dudley, M. Nei, S. Kumar, F. Tajima, M.  
1600 Clement, D. Posada, K. Crandall, H. Ryyänänen, C. Primmer, G. Bigg, C.  
1601 Cunningham, G. Ottersen, G. Pogson, M. Wadley, P. Williamson, D. Bos, S.  
1602 Turner, J. DeWoody, N. Barton, J. Piatt, K. Martin, M. Gifford, A. Larson, H.  
1603 Stoute, N. Reid, M. Hickerson, S. Ramos-Onsins, M. Blacket, J. Taylor, S.  
1604 Ciavaglia, A. Pavlova, M. Kearney, S. Chatzimanolis, M. Caterino, A. Leaché,  
1605 S. Crews, A. Templeton, E. Routman, C. Phillips, M. Sanderson, E. Arellano,  
1606 D. Rogers, H. Zakeri, G. Amparo, S. Chen, S. Spurgeon, P. Kwok, M. Simsek,  
1607 M. Tanira, K. Al-Baloushi, H. Al-Barwani, K. Lawatia, R. Bayoumi, I. van der  
1608 Heiden, M. van der Werf, J. Lindemans, R. van Schaik, J. Cheng, M. Haas, J.  
1609 Strasburg, A. Templeton, A. Caccone, Nuclear gene phylogeography using  
1610 PHASE: dealing with unresolved genotypes, lost alleles, and systematic bias in  
1611 parameter estimation. *BMC Evol Biol.* **10**, 118 (2010).
- 1612 158. M. Stephens, P. Scheet, Accounting for Decay of Linkage Disequilibrium in  
1613 Haplotype Inference and Missing-Data Imputation, 449–462 (2005).
- 1614 159. J.-F. Flot, SEQPHASE : a web tool for interconverting PHASE input/output  
1615 files and FASTA sequence alignments. *Mol Ecol Notes.* **10**, 162–166 (2010).
- 1616 160. B. Q. Minh, M. Anh Thi Nguyen, A. von Haeseler, Ultra-Fast Approximation  
1617 for Phylogenetic Bootstrap. *Mol Biol Evol.* **30**, 1188–1195 (2013).
- 1618 161. A. J. Drummond, A. Rambaut, BEAST: Bayesian evolutionary analysis by  
1619 sampling trees. *BMC Evol Biol.* **7**, 214 (2007).
- 1620 162. S. Kalyaanamoorthy, B. Q. Minh, T. K. F. Wong, A. Von Haeseler, L. S.  
1621 Jermiin, ModelFinder: Fast model selection for accurate phylogenetic  
1622 estimates. *Nat Methods.* **14**, 587–589 (2017).
- 1623 163. A. Stamatakis, RAxML-VI-HPC: maximum likelihood-based phylogenetic  
1624 analyses with thousands of taxa and mixed models. *Bioinformatics.* **22**, 2688–  
1625 2690 (2006).

- 1626 164. a Stamatakis, T. Ludwig, H. Meier, RAxML-III: a fast program for maximum  
1627 likelihood-based inference of large phylogenetic trees. *Bioinformatics*. **21**,  
1628 456–63 (2005).
- 1629 165. D. H. Huson, C. Scornavacca, Dendroscope 3: An Interactive Tool for Rooted  
1630 Phylogenetic Trees and Networks. *Syst Biol*. **61**, 1061–1067 (2012).
- 1631 166. N. M. Reid, B. C. Carstens, Phylogenetic estimation error can decrease the  
1632 accuracy of species delimitation: a Bayesian implementation of the general  
1633 mixed Yule-coalescent model. *BMC Evol Biol*. **12**, 196 (2012).
- 1634 167. L. Kaufman, P. J. Rousseeuw, *Finding Groups in Data: An Introduction to*  
1635 *Cluster Analysis* (Wiley, New York, 1990).
- 1636 168. C. Hennig, fpc: Flexible Procedures for Clustering (2020).
- 1637 169. N. Puillandre, S. Brouillet, G. Achaz, ASAP: assemble species by automatic  
1638 partitioning. *Mol Ecol Resour*. **21**, 609–620 (2021).
- 1639 170. T. Fujisawa, A. Aswad, T. G. Barraclough, A Rapid and Scalable Method for  
1640 Multilocus Species Delimitation Using Bayesian Model Comparison and  
1641 Rooted Triplets. *Syst Biol*. **65**, 759–771 (2016).
- 1642 171. D. D. Ence, B. C. Carstens, SpedeSTEM: A rapid and accurate method for  
1643 species delimitation. *Mol Ecol Resour*. **11**, 473–480 (2011).
- 1644 172. G. Jones, Algorithmic improvements to species delimitation and phylogeny  
1645 estimation under the multispecies coalescent. *J Math Biol*. **74**, 447–467 (2017).
- 1646 173. D. Meyer, A. Zeileis, K. Hornik, M. Friendly, vcd: Visualizing Categorical  
1647 Data. (2011).
- 1648 174. D. Meyer, A. Zeileis, K. Hornik, The Strucplot Framework : Visualizing Multi-  
1649 way Contingency Tables with vcd. *J Stat Softw*. **17**, 1–48 (2006).
- 1650 175. T. Package, The ggplot Package License GPL (2008).
- 1651 176. A. South, rnaturalearth: World Map Data from Natural Earth (2022).
- 1652 177. P. Beerli, Migrate, 119 (2012).
- 1653 178. P. Beerli, Estimation of migration rates and population sizes in geographically  
1654 structured populations. *Gene* (1998).
- 1655 179. P. Beerli, J. Felsenstein, Maximum likelihood estimation of a migration matrix  
1656 and effective population sizes in n subpopulations by using a coalescent  
1657 approach. *Proc Natl Acad Sci U S A*. **98**, 4563–8 (2001).
- 1658 180. P. Beerli, M. Palczewski, Unified framework to evaluate panmixia and  
1659 migration direction among multiple sampling locations. *Genetics*. **185**, 313–26  
1660 (2010).
- 1661 181. E. Raffinetti, F. Aimar, GiniWegNeg: Computing the Gini Coefficient for  
1662 Weighted and Negative Attributes. [https://CRAN.R-](https://CRAN.R-project.org/package=GiniWegNeg)  
1663 [project.org/package=GiniWegNeg](https://CRAN.R-project.org/package=GiniWegNeg) (2016).
- 1664 182. E. Raffinetti, E. Siletti, A. Vernizzi, On the Gini coefficient normalization  
1665 when attributes with negative values are considered. *Stat Methods Appl*. **24**,  
1666 507–521 (2015).
- 1667 183. Y. Huang, B. Niu, Y. Gao, L. Fu, W. Li, CD-HIT Suite: A web server for  
1668 clustering and comparing biological sequences. *Bioinformatics*. **26**, 680–682  
1669 (2010).
- 1670 184. W. Li, A. Godzik, Cd-hit: A fast program for clustering and comparing large  
1671 sets of protein or nucleotide sequences. *Bioinformatics*. **22**, 1658–1659 (2006).
- 1672 185. P. Pons, M. Latapy, “Computing communities in large networks using random  
1673 walks” (2005).

- 1674 186. U. N. Raghavan, R. Albert, S. Kumara, Near linear time algorithm to detect  
1675 community structures in large-scale networks. *Phys Rev E Stat Nonlin Soft*  
1676 *Matter Phys.* **76** (2007), doi:10.1103/PhysRevE.76.036106.
- 1677 187. M. Rosvall, C. T. Bergstrom, “Maps of random walks on complex networks  
1678 reveal community structure” (2008), (available at  
1679 [www.pnas.org/cgi/content/full/](http://www.pnas.org/cgi/content/full/)).
- 1680 188. V. Policastro, D. Righelli, A. Carissimo, L. Cutillo, I. De Feis, “ROBustness In  
1681 Network (robin): an R Package for Comparison and Validation of  
1682 Communities.”
- 1683 189. M. Meilă, Comparing clusterings-an information based distance. *J Multivar*  
1684 *Anal.* **98**, 873–895 (2007).
- 1685 190. A. A. Kalaitzis, N. D. Lawrence, A simple approach to ranking differentially  
1686 expressed gene expression time courses through Gaussian process regression.  
1687 *BMC Bioinformatics.* **12** (2011), doi:10.1186/1471-2105-12-180.
- 1688 191. C. Dormann, J. Fruend, B. Gruber, M. Devoto, J. Iriando, R. Strauss, D.  
1689 Vazquez, N. Bluethgen, A. Clauset, R. Strauss, M. Rodriguez, Package  
1690 ‘bipartite’: Visualising Bipartite Networks and Calculating Some (Ecological)  
1691 (2017), doi:10.1002/sim.4177>.
- 1692 192. S. Andrews, FastQC: A Quality Control Tool for High Throughput Sequence  
1693 Data. <http://www.bioinformatics.babraham.ac.uk/projects/fastqc/> (2010),  
1694 (available at <https://qubeshub.org/resources/fastqc/>).
- 1695 193. A. M. Bolger, M. Lohse, B. Usadel, Trimmomatic: A flexible trimmer for  
1696 Illumina sequence data. *Bioinformatics.* **30**, 2114–2120 (2014).
- 1697 194. A. Bankevich, S. Nurk, D. Antipov, A. a. Gurevich, M. Dvorkin, A. S.  
1698 Kulikov, V. M. Lesin, S. I. Nikolenko, S. Pham, A. D. Prjibelski, A. V.  
1699 Pyshkin, A. V. Sirotkin, N. Vyahhi, G. Tesler, M. a. Alekseyev, P. a. Pevzner,  
1700 SPAdes: A New Genome Assembly Algorithm and Its Applications to Single-  
1701 Cell Sequencing. *Journal of Computational Biology.* **19**, 455–477 (2012).
- 1702 195. A. Gurevich, V. Saveliev, N. Vyahhi, G. Tesler, QUASt: Quality assessment  
1703 tool for genome assemblies. *Bioinformatics.* **29**, 1072–1075 (2013).
- 1704 196. F. A. Simão, R. M. Waterhouse, P. Ioannidis, E. V. Kriventseva, E. M.  
1705 Zdobnov, BUSCO: Assessing genome assembly and annotation completeness  
1706 with single-copy orthologs. *Bioinformatics.* **31**, 3210–3212 (2015).
- 1707 197. M. Boetzer, C. v. Henkel, H. J. Jansen, D. Butler, W. Pirovano, Scaffolding  
1708 pre-assembled contigs using SSPACE. *Bioinformatics.* **27**, 578–579 (2011).
- 1709 198. S. F. Altschul, W. Gish, W. Miller, E. W. Myers, D. J. Lipman, Basic local  
1710 alignment search tool. *J Mol Biol.* **215**, 403–410 (1990).
- 1711 199. B. Buchfink, C. Xie, D. H. Huson, Fast and sensitive protein alignment using  
1712 DIAMOND. *Nat Methods.* **12**, 59–60 (2015).
- 1713 200. D. H. Huson, S. Beier, I. Flade, A. Górska, M. El-Hadidi, S. Mitra, H. J.  
1714 Ruscheweyh, R. Tappu, MEGAN Community Edition - Interactive Exploration  
1715 and Analysis of Large-Scale Microbiome Sequencing Data. *PLoS Comput Biol.*  
1716 **12** (2016), doi:10.1371/journal.pcbi.1004957.
- 1717 201. F. A. Simão, R. M. Waterhouse, P. Ioannidis, E. v. Kriventseva, E. M.  
1718 Zdobnov, BUSCO: Assessing genome assembly and annotation completeness  
1719 with single-copy orthologs. *Bioinformatics.* **31**, 3210–3212 (2015).
- 1720 202. J. Huerta-Cepas, D. Szklarczyk, K. Forslund, H. Cook, D. Heller, M. C.  
1721 Walter, T. Rattei, D. R. Mende, S. Sunagawa, M. Kuhn, L. J. Jensen, C. von  
1722 Mering, P. Bork, EGGNOG 4.5: A hierarchical orthology framework with



- 1723 improved functional annotations for eukaryotic, prokaryotic and viral  
1724 sequences. *Nucleic Acids Res.* **44**, D286–D293 (2016).
- 1725 203. C. P. Cantalapiedra, A. Hernandez-Plaza, I. Letunic, P. Bork, J. Huerta-Cepas,  
1726 eggNOG-mapper v2: Functional Annotation, Orthology Assignments, and  
1727 Domain Prediction at the Metagenomic Scale. *Mol Biol Evol.* **38**, 5825–5829  
1728 (2021).
- 1729 204. Jon Palmer, Jason Stajich, funannotate v1.5.3 (2019).
- 1730 205. N. A. O’Leary, M. W. Wright, J. R. Brister, S. Ciufu, D. Haddad, R. McVeigh,  
1731 B. Rajput, B. Robbertse, B. Smith-White, D. Ako-Adjei, A. Astashyn, A.  
1732 Badretdin, Y. Bao, O. Blinkova, V. Brover, V. Chetvernin, J. Choi, E. Cox, O.  
1733 Ermolaeva, C. M. Farrell, T. Goldfarb, T. Gupta, D. Haft, E. Hatcher, W.  
1734 Hlavina, V. S. Joardar, V. K. Kodali, W. Li, D. Maglott, P. Masterson, K. M.  
1735 McGarvey, M. R. Murphy, K. O’Neill, S. Pujar, S. H. Rangwala, D. Rausch, L.  
1736 D. Riddick, C. Schoch, A. Shkeda, S. S. Storz, H. Sun, F. Thibaud-Nissen, I.  
1737 Tolstoy, R. E. Tully, A. R. Vatsan, C. Wallin, D. Webb, W. Wu, M. J.  
1738 Landrum, A. Kimchi, T. Tatusova, M. DiCuccio, P. Kitts, T. D. Murphy, K. D.  
1739 Pruitt, Reference sequence (RefSeq) database at NCBI: current status,  
1740 taxonomic expansion, and functional annotation. *Nucleic Acids Res.* **44**, D733–  
1741 D745 (2016).
- 1742 206. C. Holt, M. Yandell, MAKER2: An annotation pipeline and genome-database  
1743 management tool for second-generation genome projects. *BMC Bioinformatics.*  
1744 **12** (2011), doi:10.1186/1471-2105-12-491.
- 1745 207. A. Conesa, S. Gotz, J. M. Garcia-Gomez, J. Terol, M. Talon, M. Robles,  
1746 Blast2GO: a universal tool for annotation, visualization and analysis in  
1747 functional genomics research. *Bioinformatics.* **21**, 3674–3676 (2005).
- 1748 208. P. Jones, D. Binns, H. Y. Chang, M. Fraser, W. Li, C. McAnulla, H.  
1749 McWilliam, J. Maslen, A. Mitchell, G. Nuka, S. Pesseat, A. F. Quinn, A.  
1750 Sangrador-Vegas, M. Scheremetjew, S. Y. Yong, R. Lopez, S. Hunter,  
1751 InterProScan 5: Genome-scale protein function classification. *Bioinformatics.*  
1752 **30**, 1236–1240 (2014).
- 1753 209. K. Blin, S. Shaw, A. M. Kloosterman, Z. Charlop-Powers, G. P. van Wezel, M.  
1754 H. Medema, T. Weber, AntiSMASH 6.0: Improving cluster detection and  
1755 comparison capabilities. *Nucleic Acids Res.* **49**, W29–W35 (2021).
- 1756 210. J. C. Navarro-Muñoz, N. Selem-Mojica, M. W. Mullowney, S. A. Kautsar, J.  
1757 H. Tryon, E. I. Parkinson, E. L. C. de Los Santos, M. Yeong, P. Cruz-Morales,  
1758 S. Abubucker, A. Roeters, W. Lokhorst, A. Fernandez-Guerra, L. T. D.  
1759 Cappelini, A. W. Goering, R. J. Thomson, W. W. Metcalf, N. L. Kelleher, F.  
1760 Barona-Gomez, M. H. Medema, A computational framework to explore large-  
1761 scale biosynthetic diversity. *Nat Chem Biol.* **16**, 60–68 (2020).
- 1762 211. Y. Wang, H. Tang, J. D. Debarry, X. Tan, J. Li, X. Wang, T. H. Lee, H. Jin, B.  
1763 Marler, H. Guo, J. C. Kissinger, A. H. Paterson, MCScanX: A toolkit for  
1764 detection and evolutionary analysis of gene synteny and collinearity. *Nucleic*  
1765 *Acids Res.* **40** (2012), doi:10.1093/nar/gkr1293.
- 1766 212. S. van Wyk, C. H. Harrison, B. D. Wingfield, L. de Vos, N. A. van der Merwe,  
1767 E. T. Steenkamp, The RIPper, a web-based tool for genome-wide  
1768 quantification of Repeat-Induced Point (RIP) mutations. *PeerJ.* **2019** (2019),  
1769 doi:10.7717/peerj.7447.
- 1770 213. J. M. Flynn, R. Hubley, C. Goubert, J. Rosen, A. G. Clark, C. Feschotte, A. F.  
1771 Smit, RepeatModeler2 for automated genomic discovery of transposable

- 1772 element families. *Proceedings of the National Academy of Sciences*. **117**,  
1773 9451–9457 (2020).
- 1774 214. W. Bao, K. K. Kojima, O. Kohany, Repbase Update, a database of repetitive  
1775 elements in eukaryotic genomes. *Mob DNA*. **6** (2015), doi:10.1186/s13100-  
1776 015-0041-9.
- 1777 215. E. Gluck-Thaler, T. Ralston, Z. Konkell, C. G. Ocampos, V. D. Ganeshan, A. E.  
1778 Dorrance, T. L. Niblack, C. W. Wood, J. C. Slot, H. D. Lopez-Nicora, A. A.  
1779 Vogan, Giant Starship Elements Mobilize Accessory Genes in Fungal  
1780 Genomes. *Mol Biol Evol*. **39** (2022), doi:10.1093/molbev/msac109.
- 1781 216. D. M. Emms, S. Kelly, OrthoFinder: Phylogenetic orthology inference for  
1782 comparative genomics. *Genome Biol*. **20**, 1–14 (2019).
- 1783 217. S. Capella-Gutiérrez, J. M. Silla-Martínez, T. Gabaldón, trimAl: A tool for  
1784 automated alignment trimming in large-scale phylogenetic analyses.  
1785 *Bioinformatics*. **25**, 1972–1973 (2009).
- 1786 218. B. Q. Minh, H. A. Schmidt, O. Chernomor, D. Schrempf, M. D. Woodhams, A.  
1787 von Haeseler, R. Lanfear, E. Teeling, IQ-TREE 2: New Models and Efficient  
1788 Methods for Phylogenetic Inference in the Genomic Era. *Mol Biol Evol*. **37**,  
1789 1530–1534 (2020).
- 1790 219. L. Salichos, A. Stamatakis, A. Rokas, Novel information theory-based  
1791 measures for quantifying incongruence among phylogenetic trees. *Mol Biol*  
1792 *Evol*. **31**, 1261–1271 (2014).
- 1793 220. K. Kobert, L. Salichos, A. Rokas, A. Stamatakis, Computing the Internode  
1794 Certainty and Related Measures from Partial Gene Trees. *Mol Biol Evol*. **33**,  
1795 1606–1617 (2016).
- 1796 221. B. Gel, E. Serra, KaryoploteR: An R/Bioconductor package to plot  
1797 customizable genomes displaying arbitrary data. *Bioinformatics*. **33**, 3088–  
1798 3090 (2017).
- 1799 222. M. Lawrence, W. Huber, H. Pagès, P. Aboyoun, M. Carlson, R. Gentleman, M.  
1800 T. Morgan, V. J. Carey, Software for Computing and Annotating Genomic  
1801 Ranges. *PLoS Comput Biol*. **9** (2013), doi:10.1371/journal.pcbi.1003118.
- 1802 223. Z. Gu, L. Gu, R. Eils, M. Schlesner, B. Brors, Circlize implements and  
1803 enhances circular visualization in R. *Bioinformatics*. **30**, 2811–2812 (2014).  
1804
